# Supplementary material
Source: PubMed Central journal article supplement (PMC4354858)
Supplement: NIHMS667215-supplement-Supp_1.pdf [file NIHMS667215-supplement-Supp_1.pdf]

Figure S1

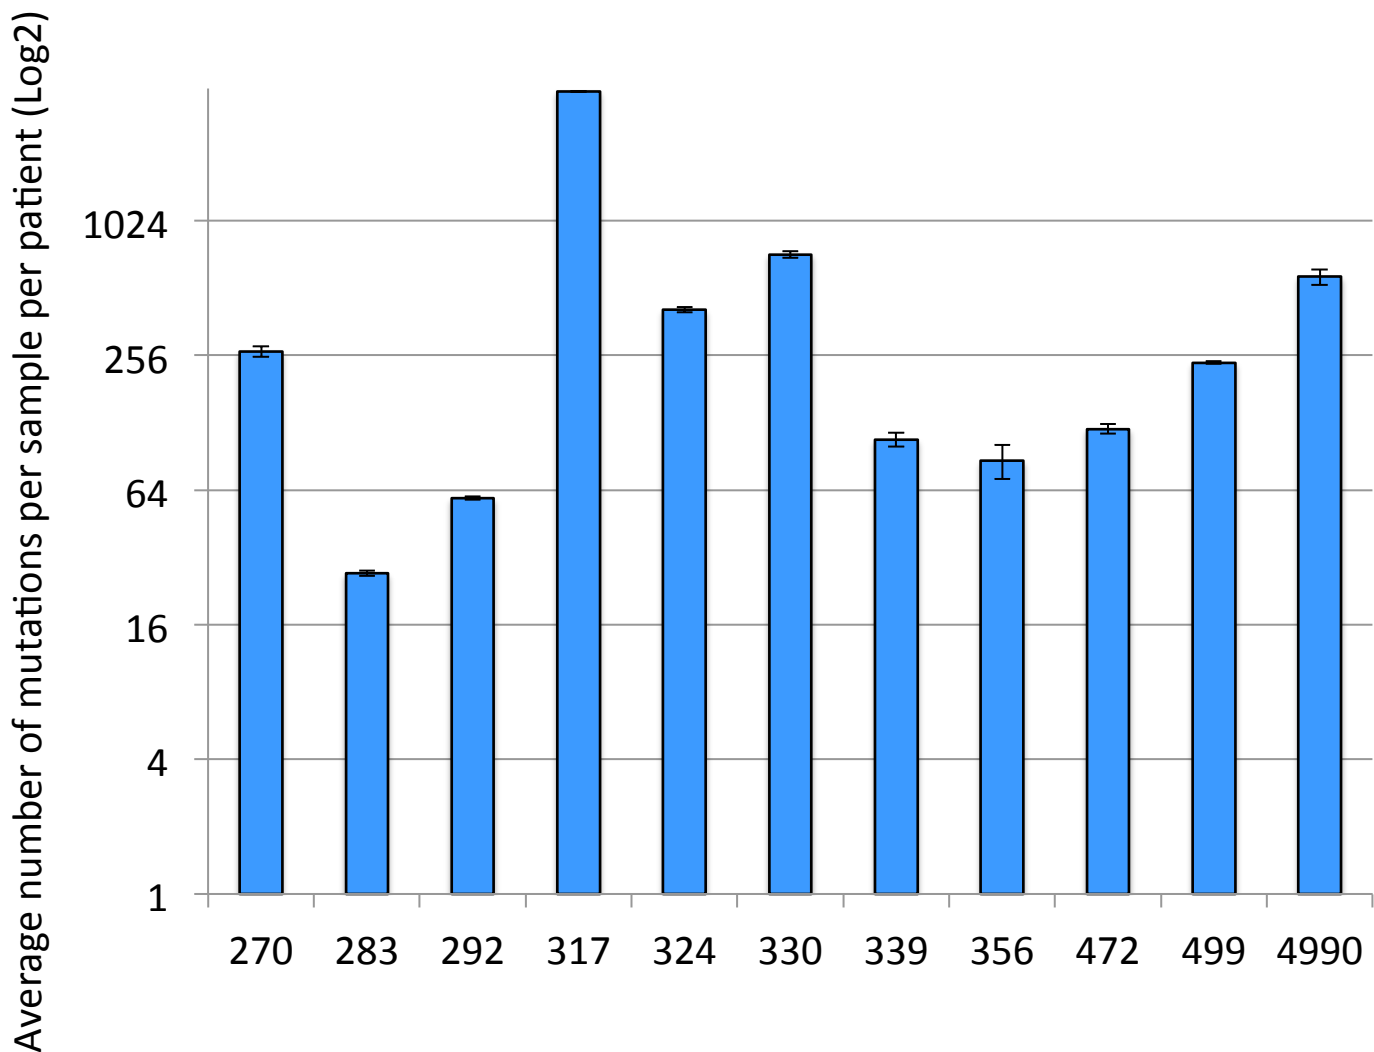

Figure S2A

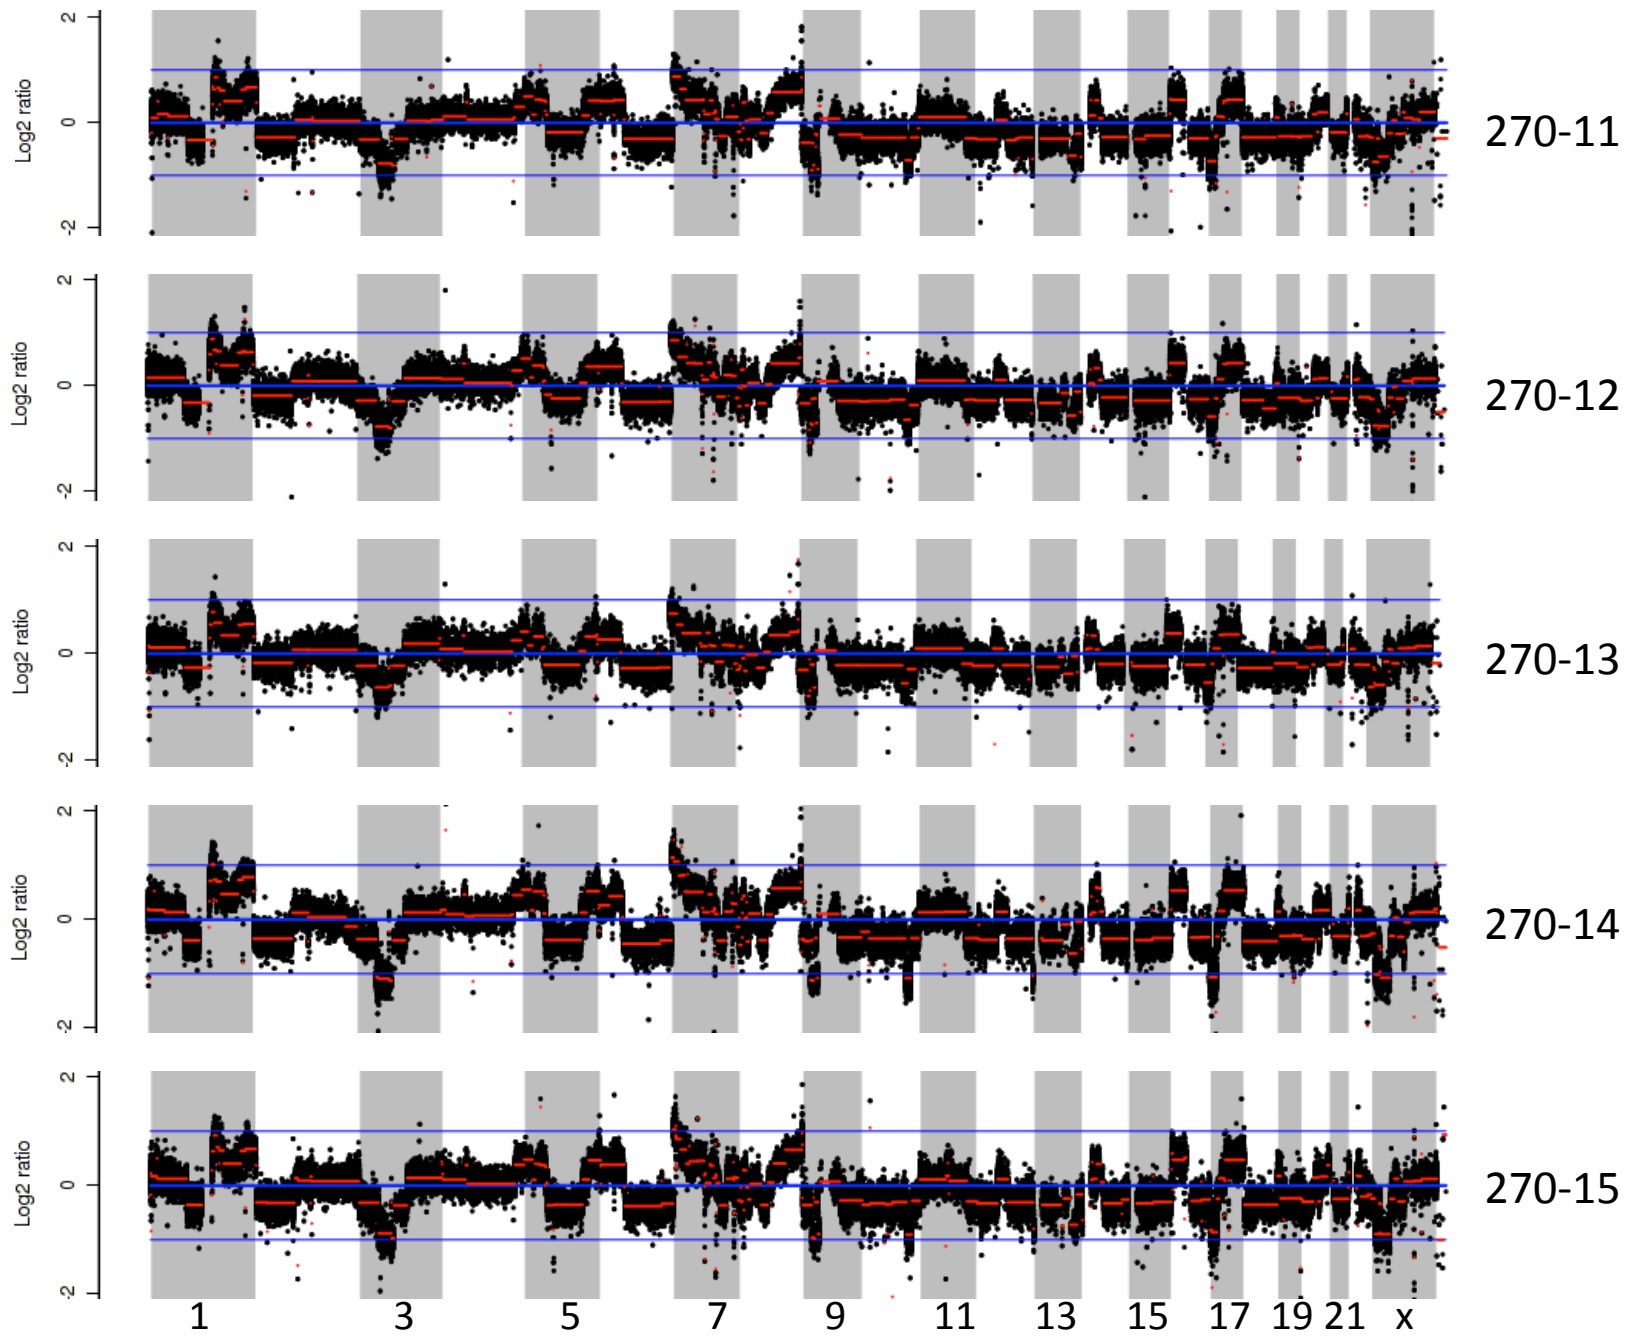

Figure S2A

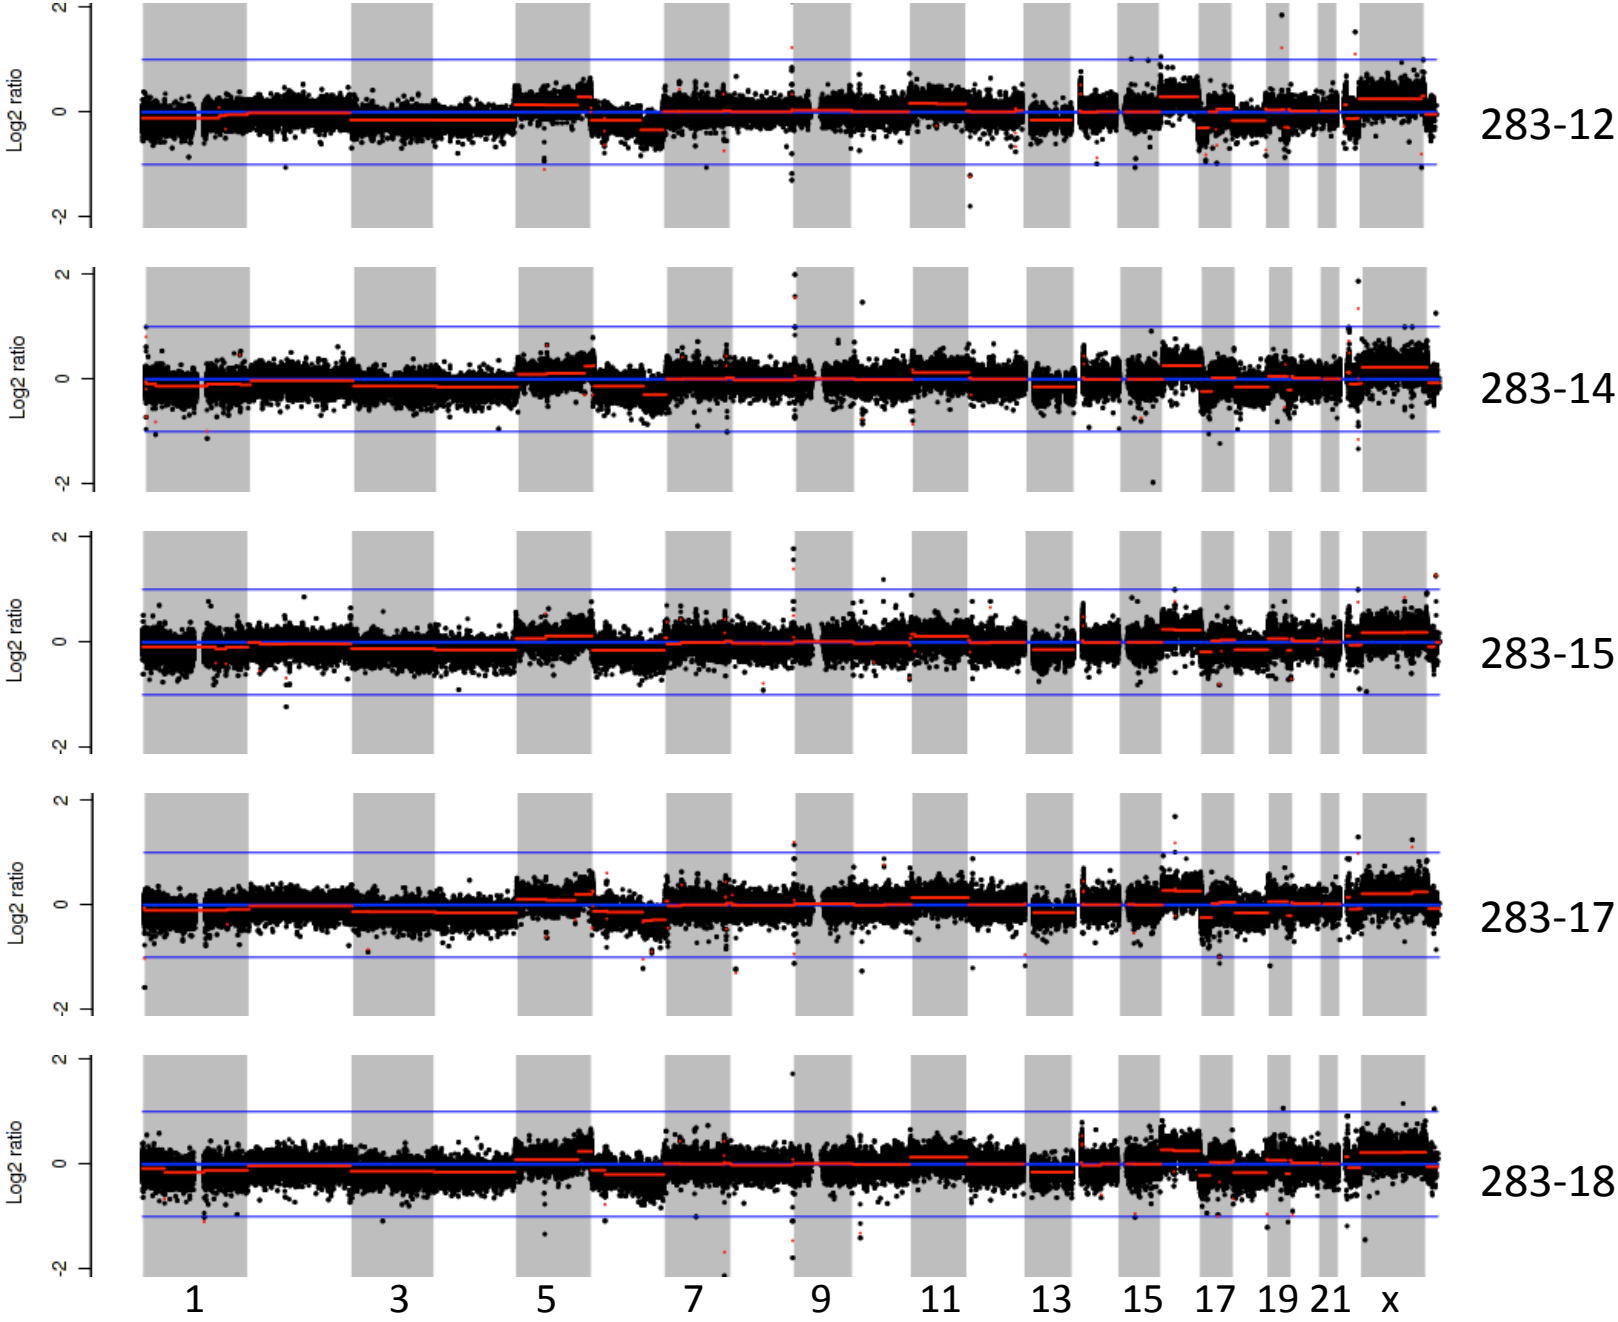

Figure S2A

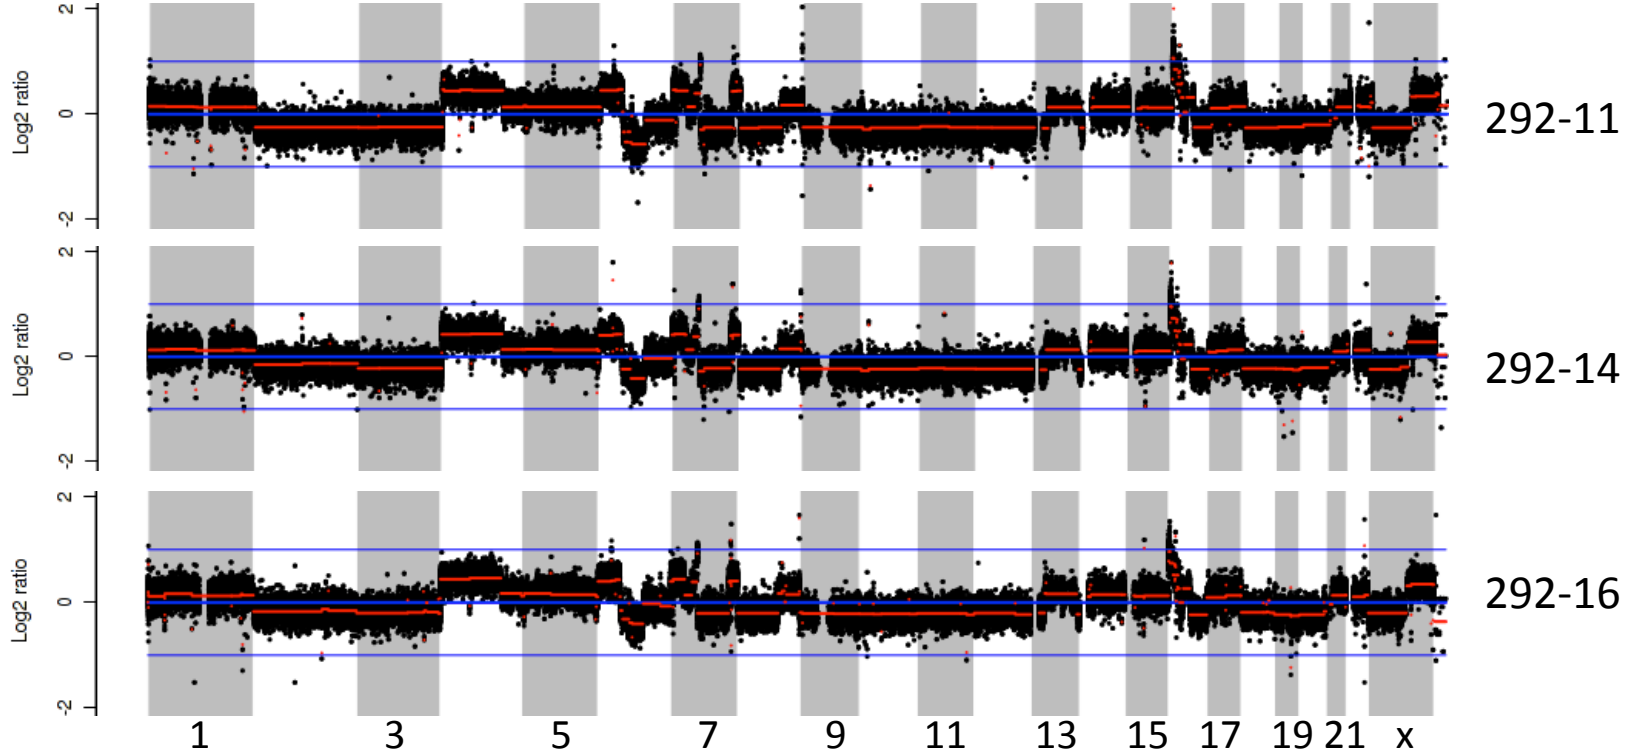

Figure S2A

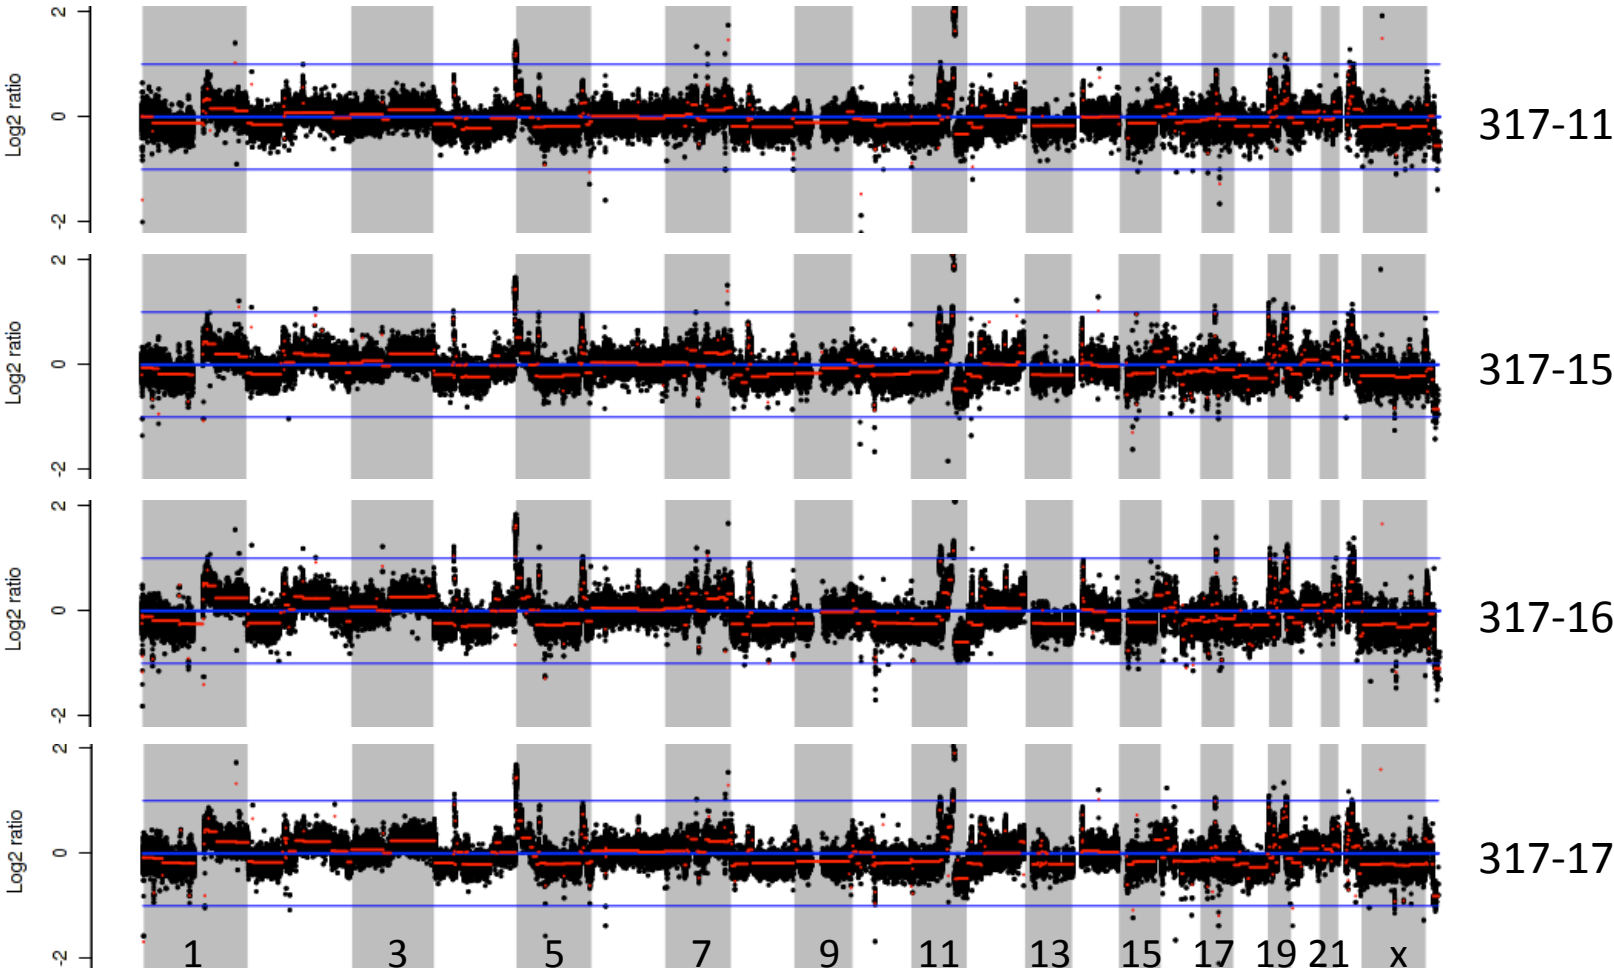

Figure S2A

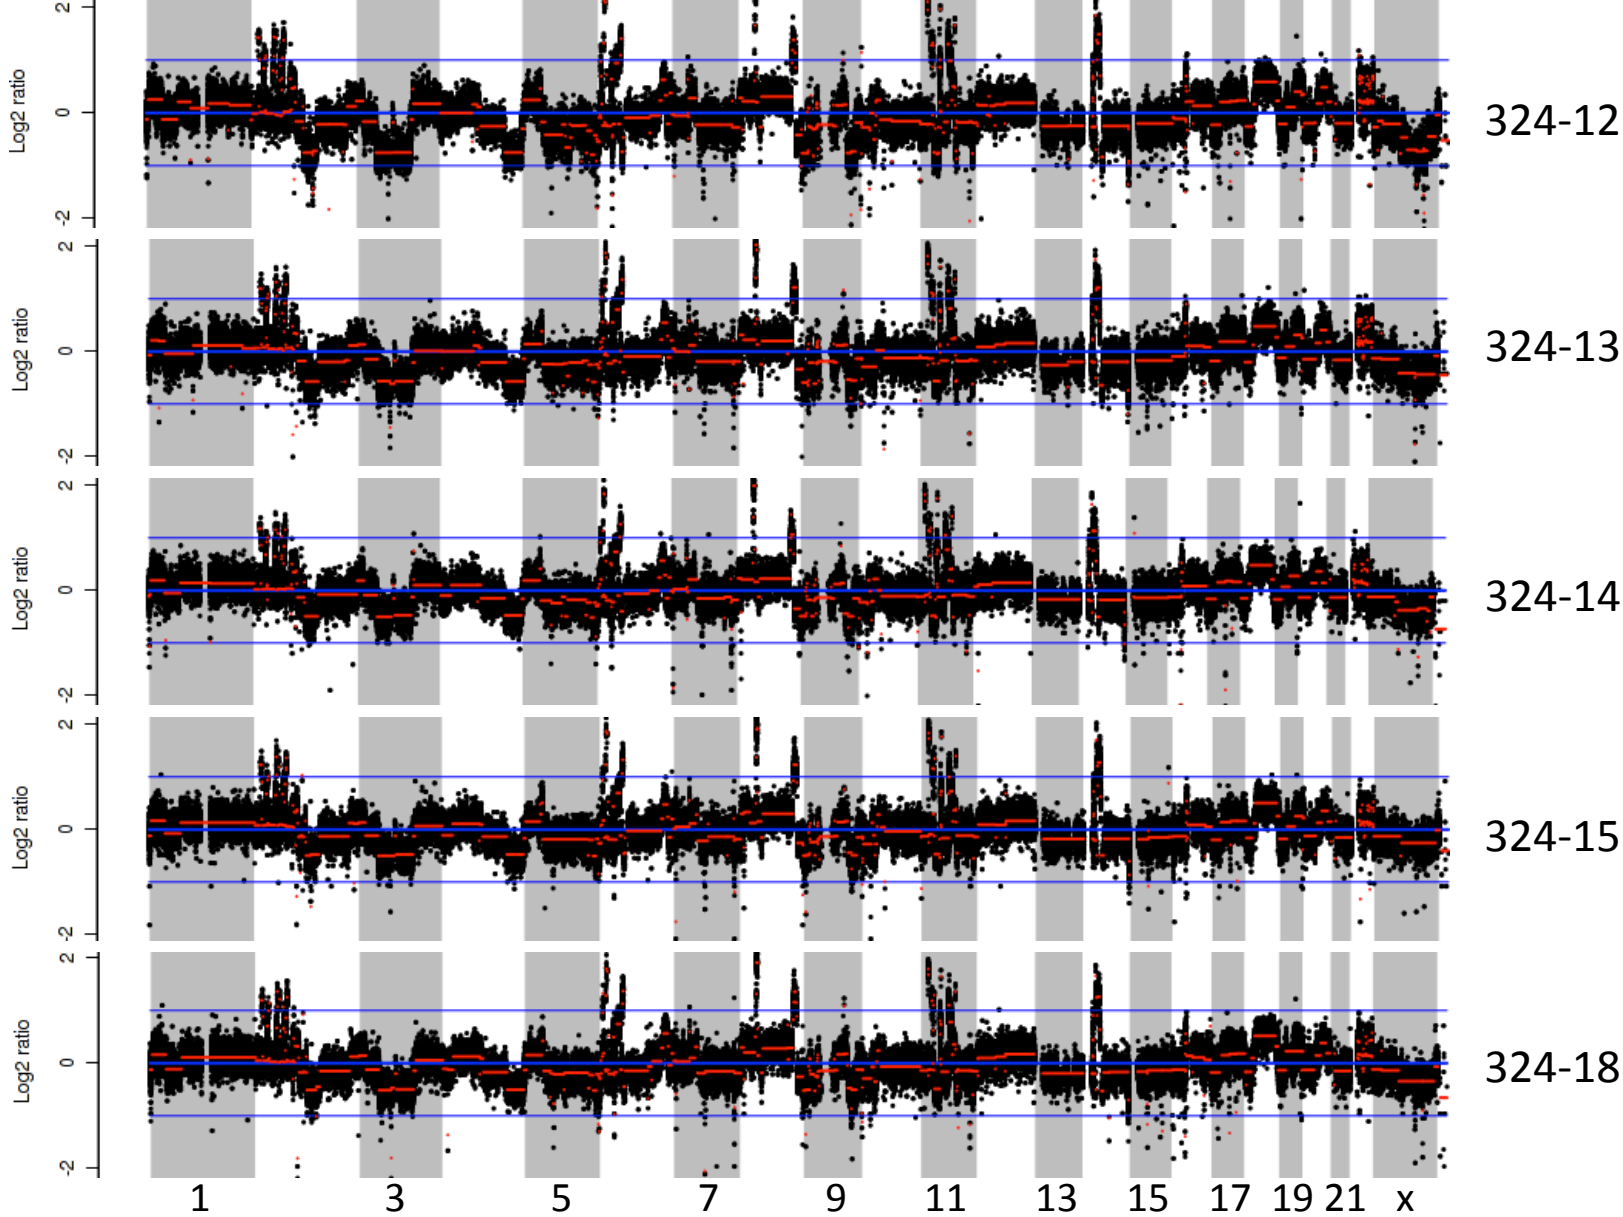

Figure S2A

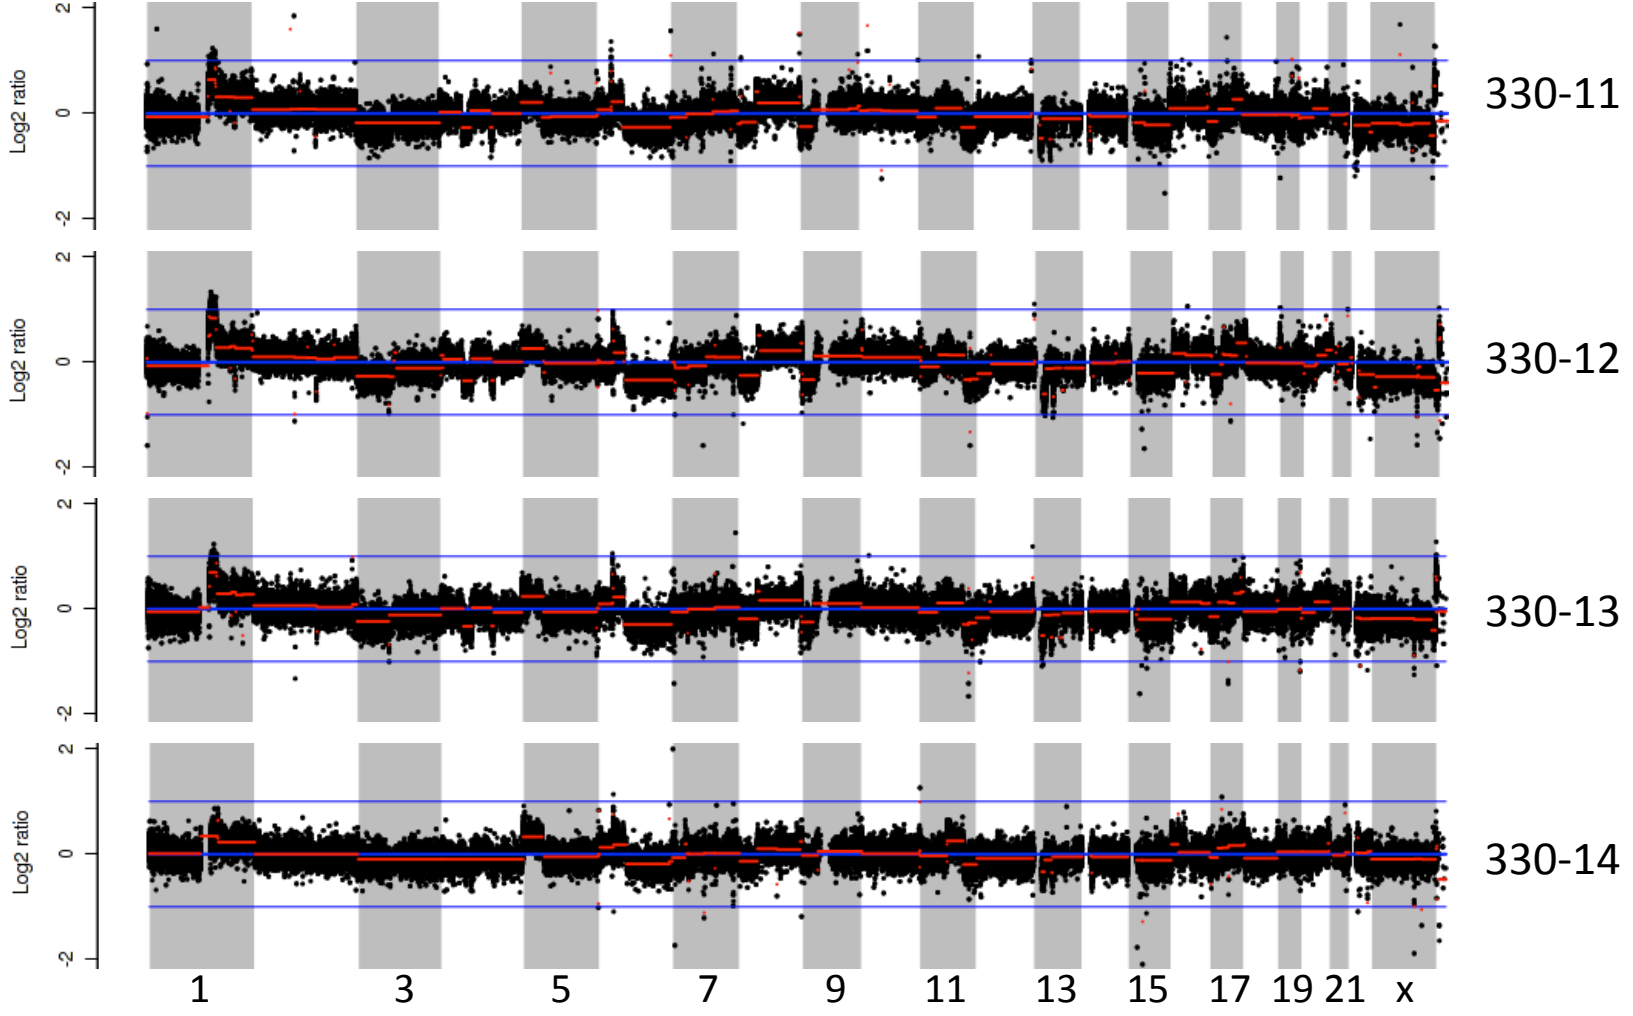

Figure S2A

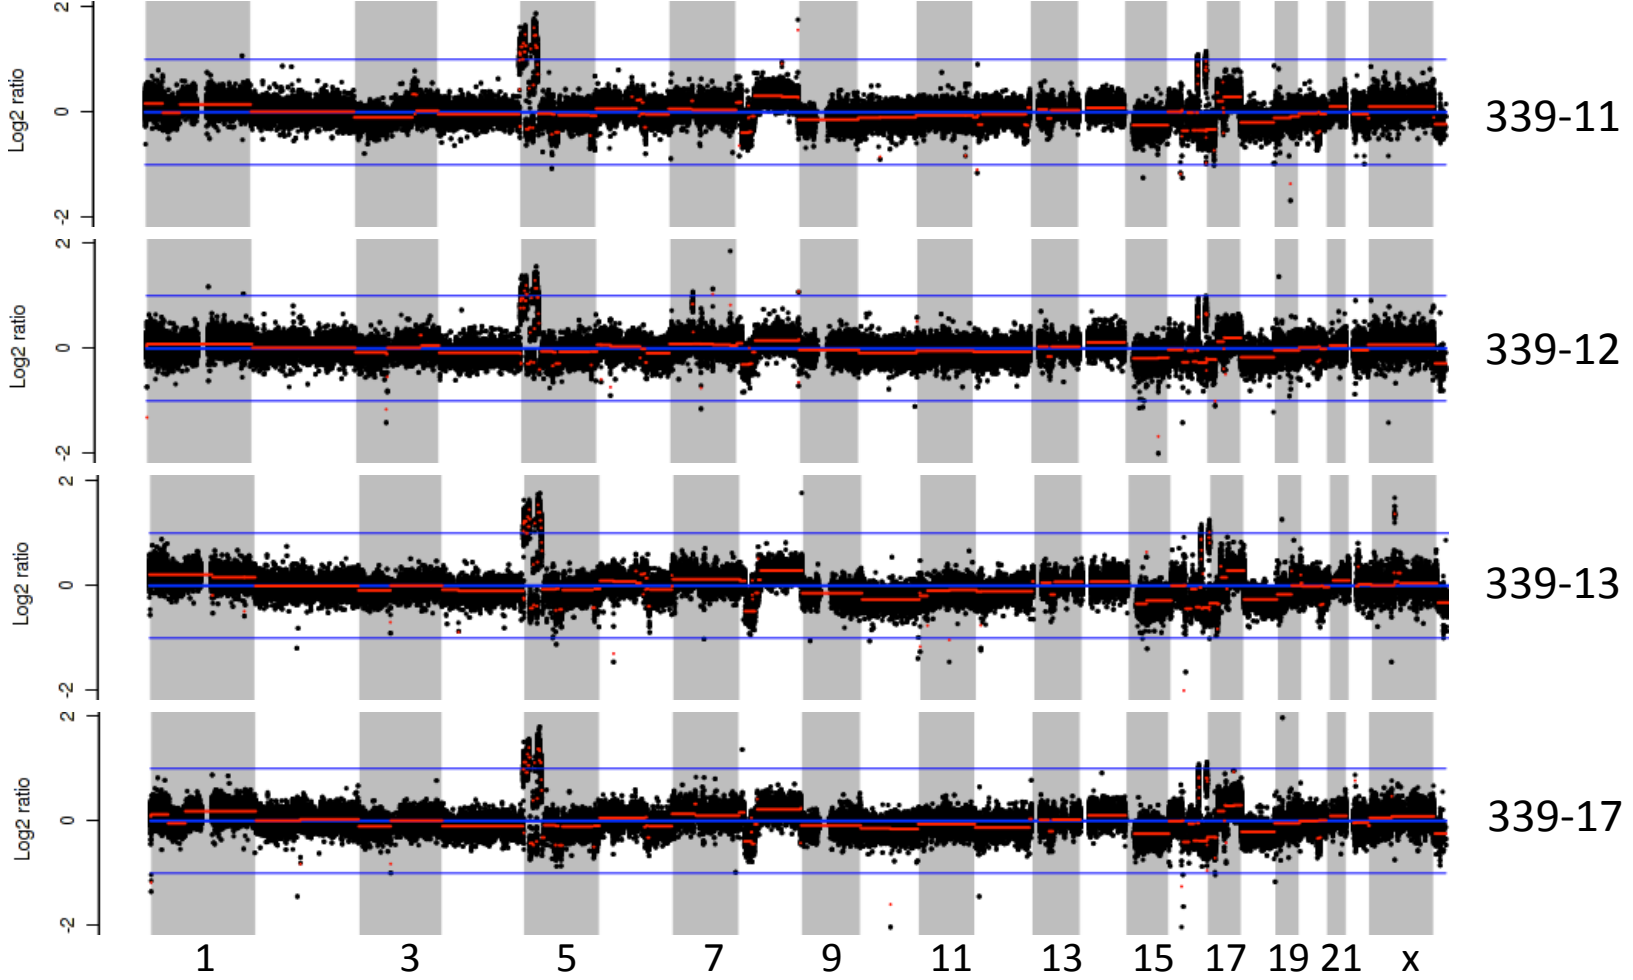



Figure S2A

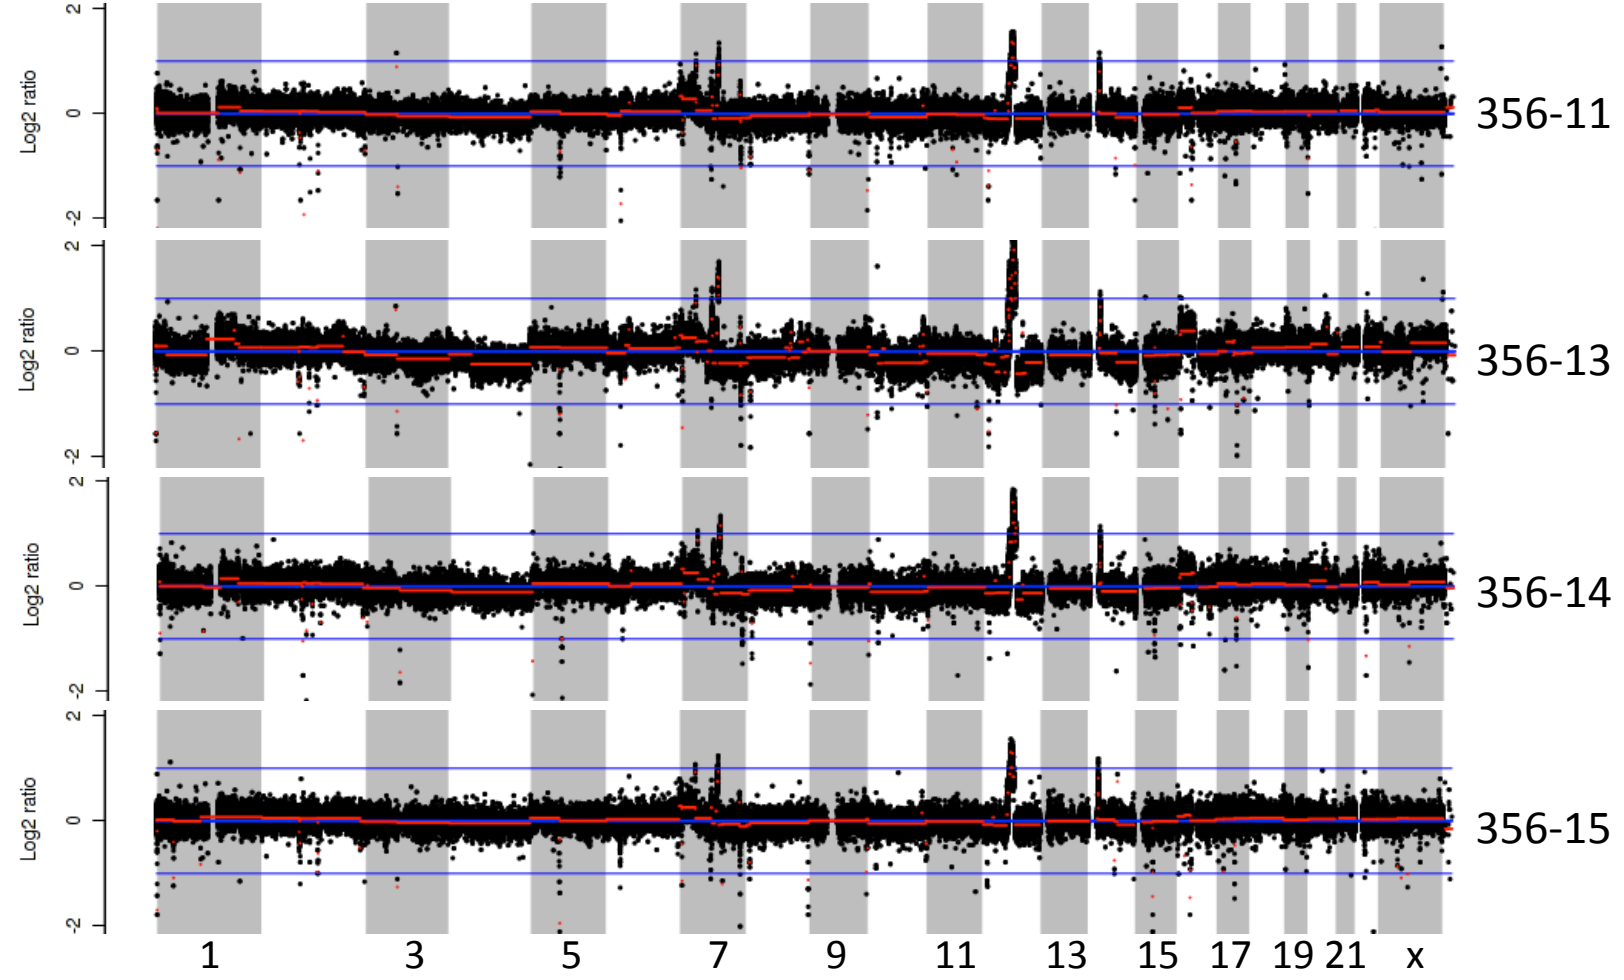

Figure S2A

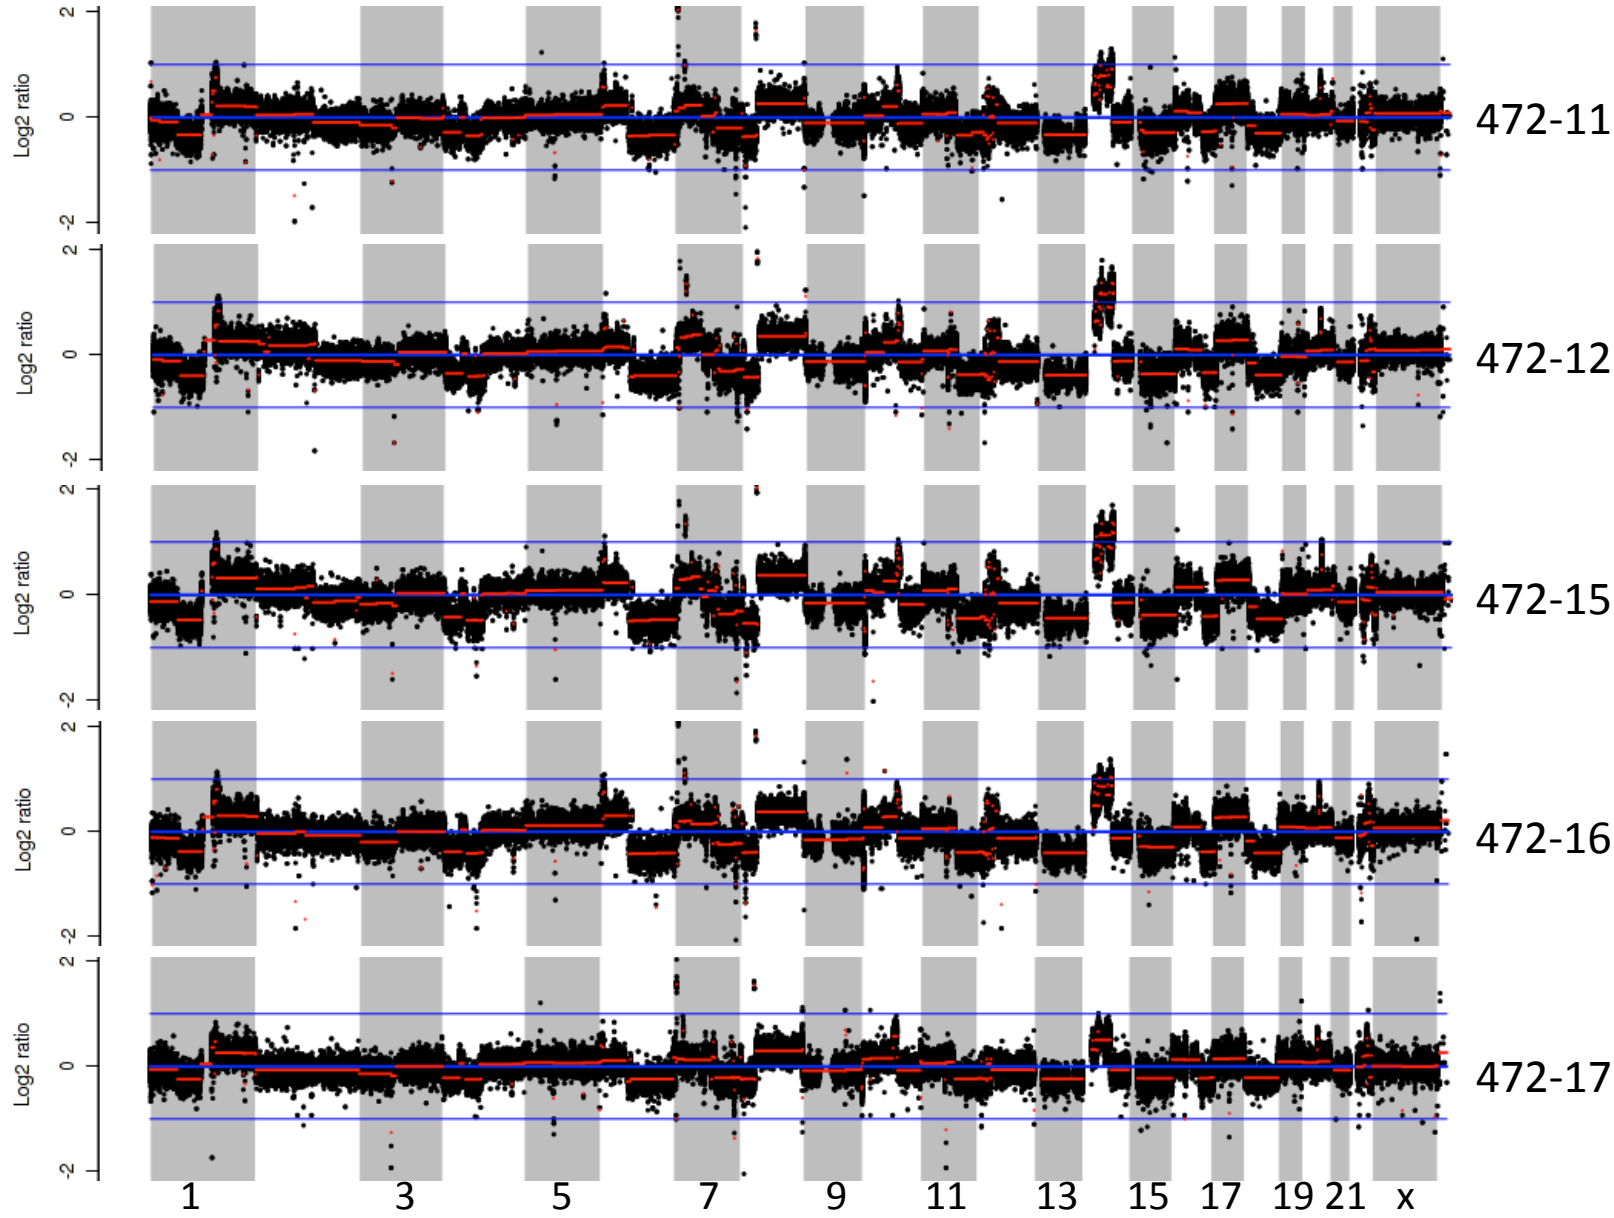

Figure S2A

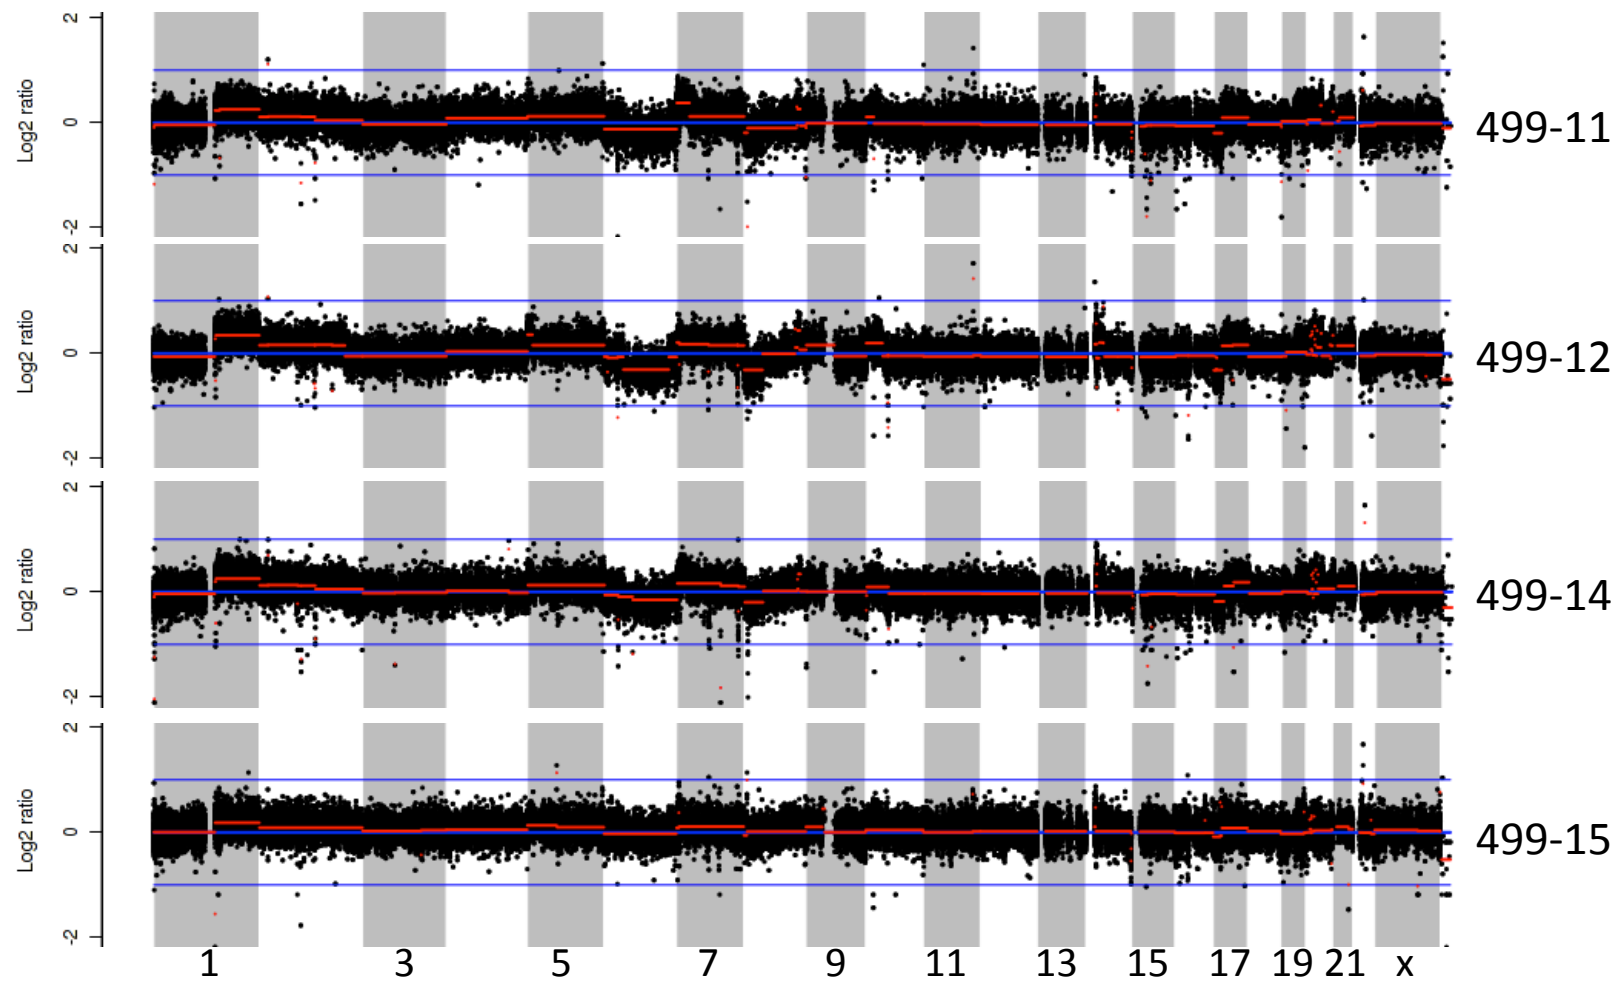

Figure S2A

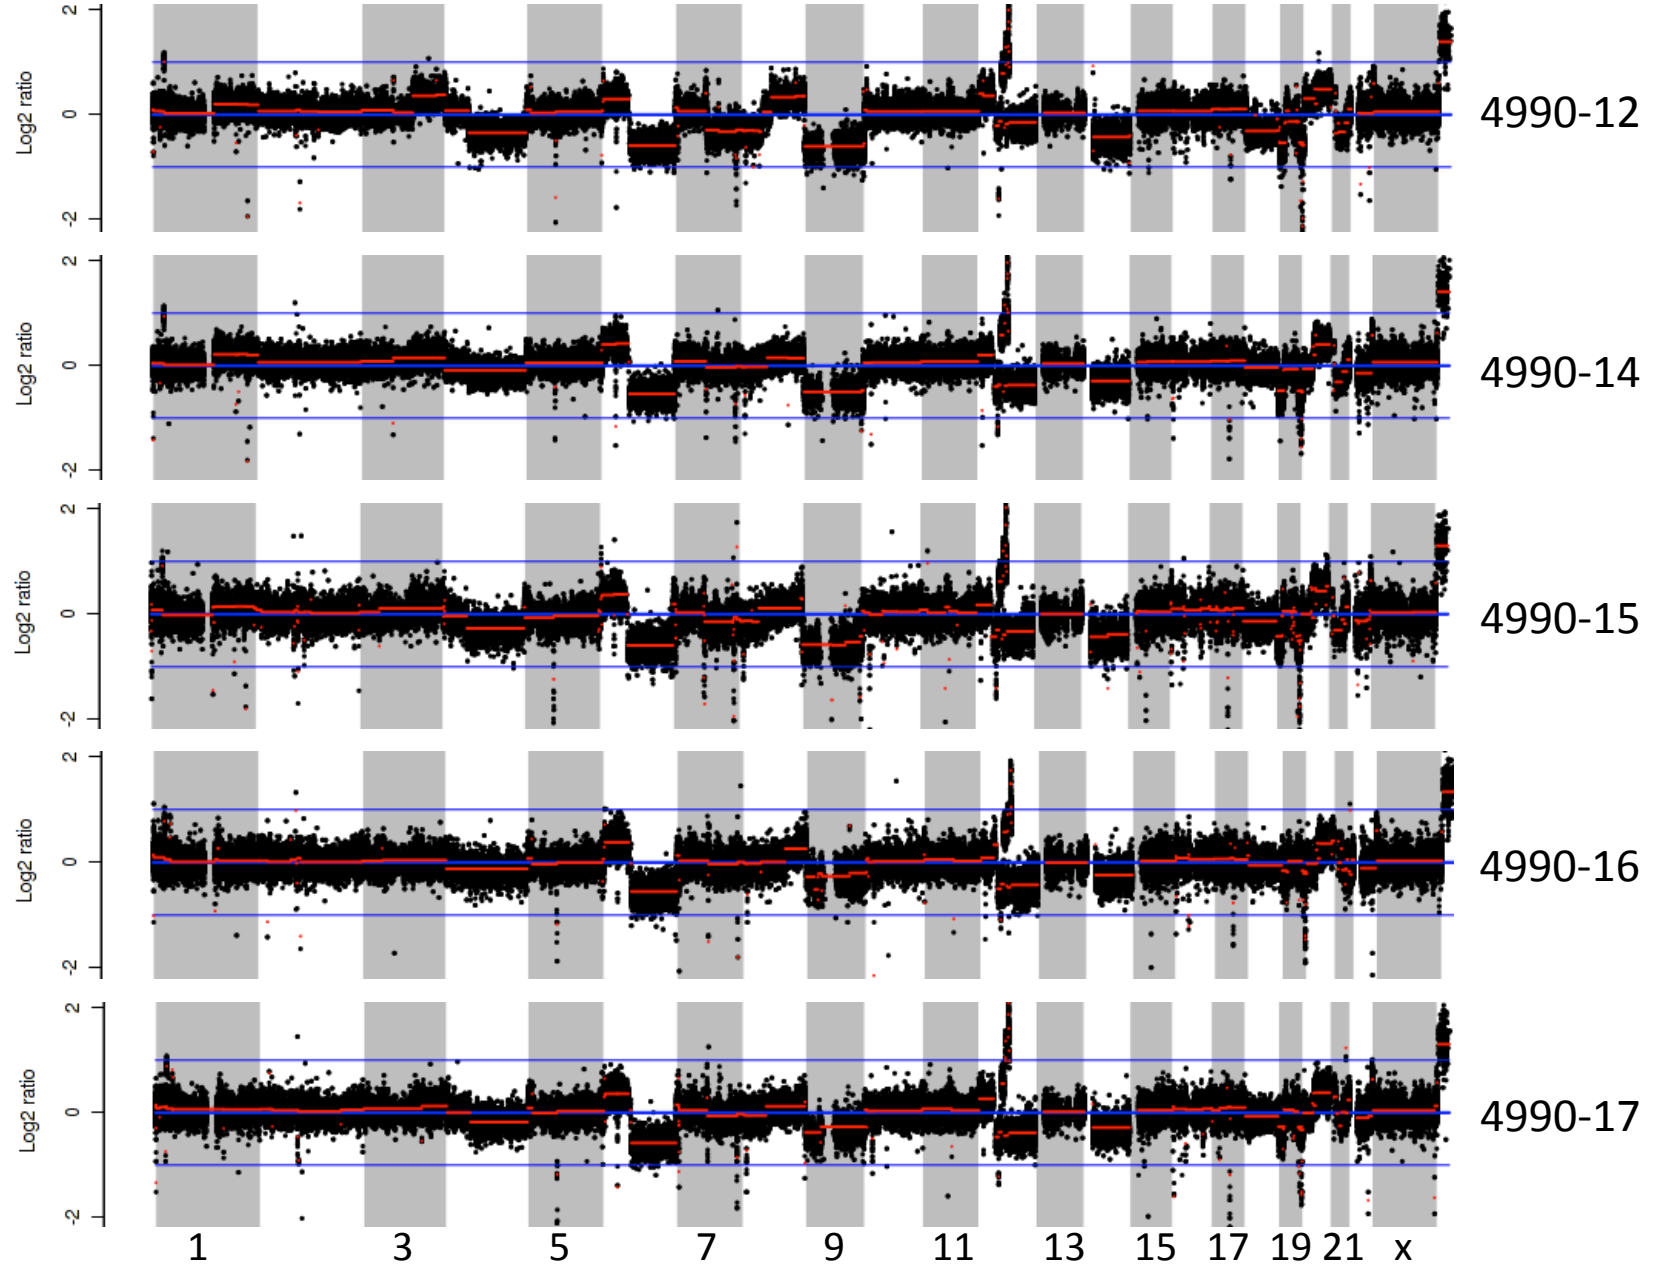

Figure S2B

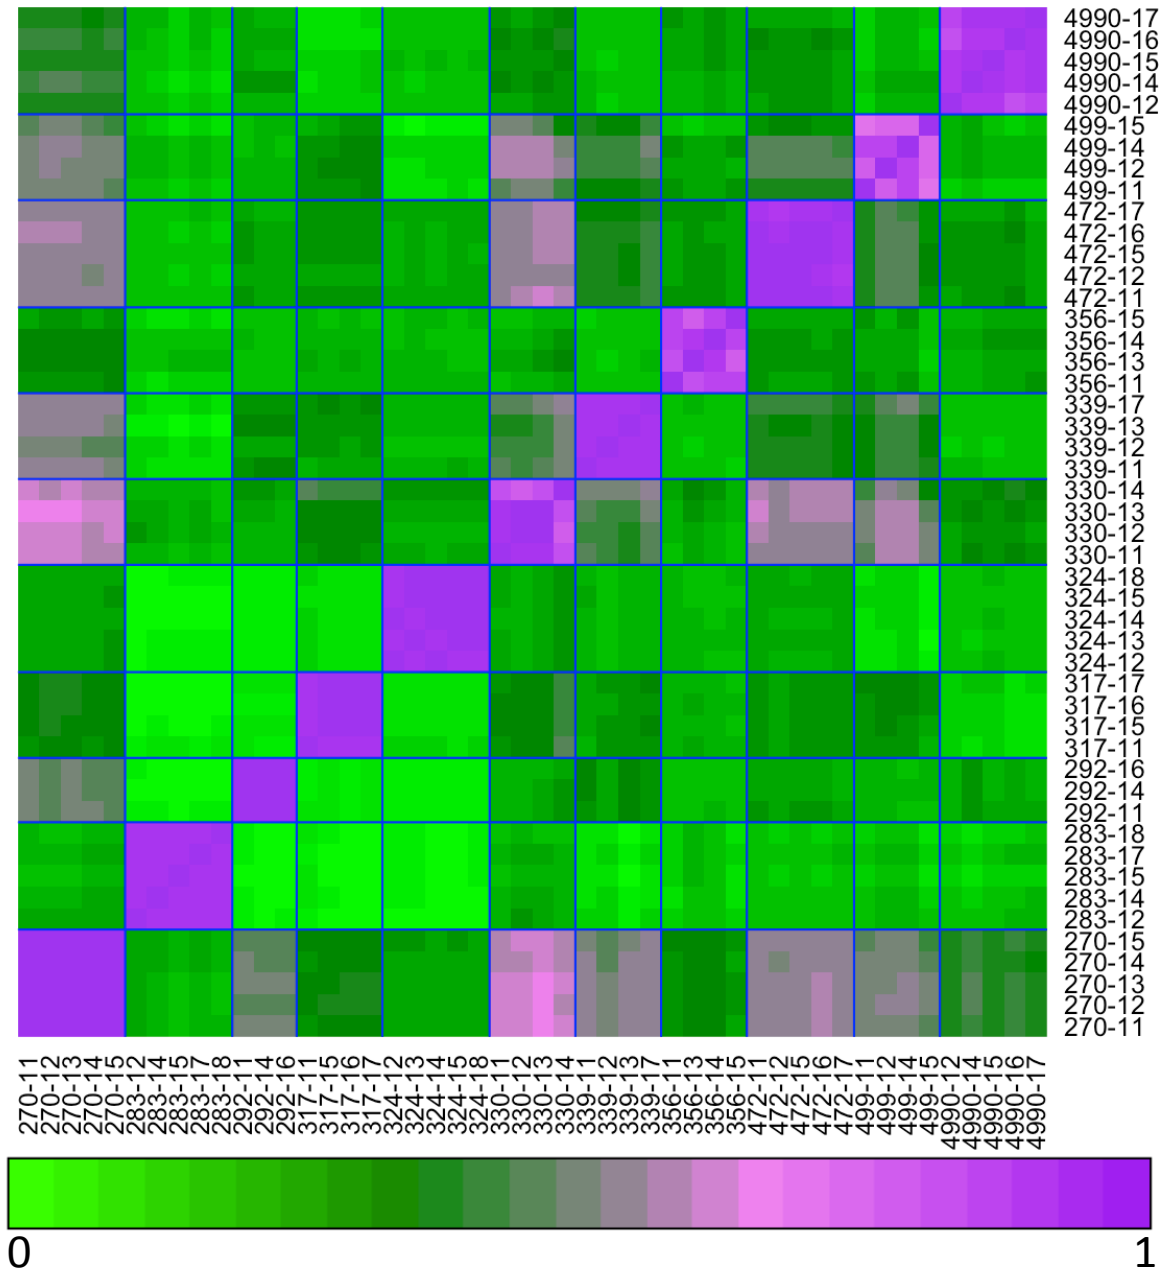

Figure S3

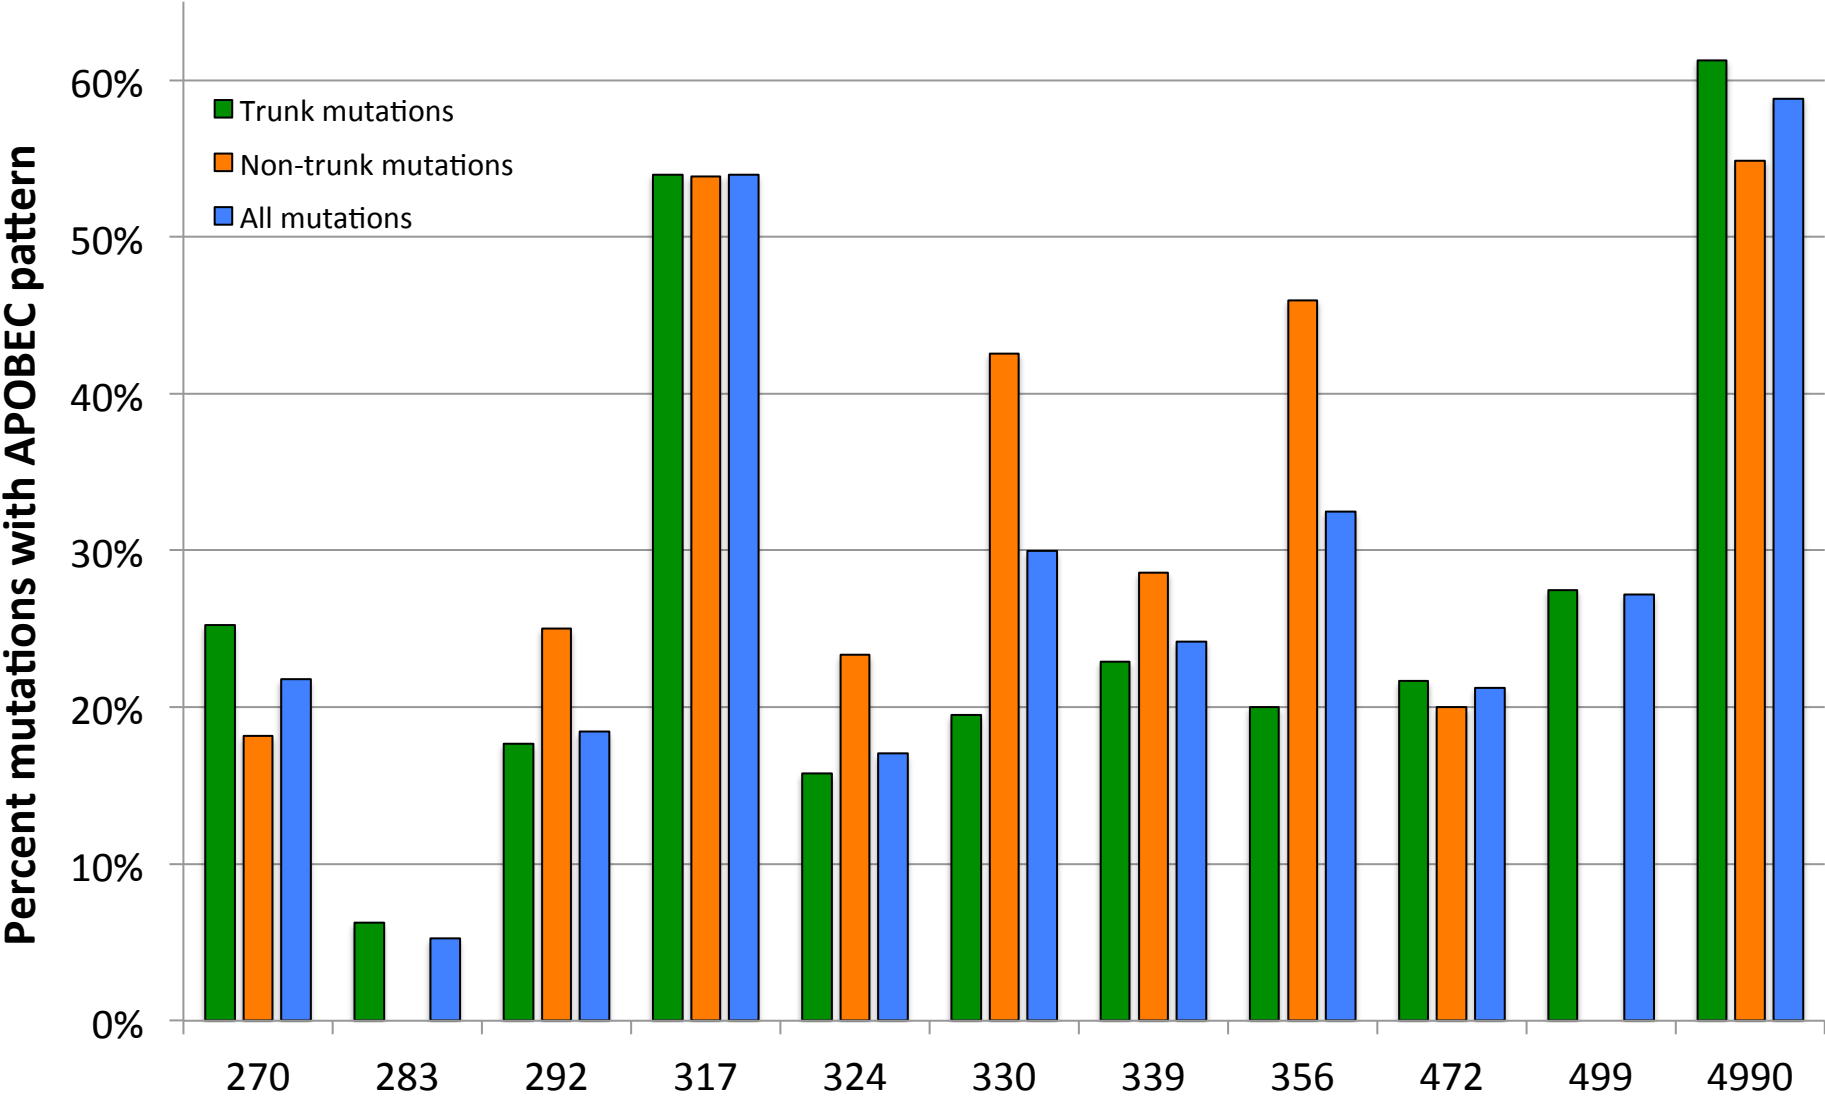

Figure S4A

270

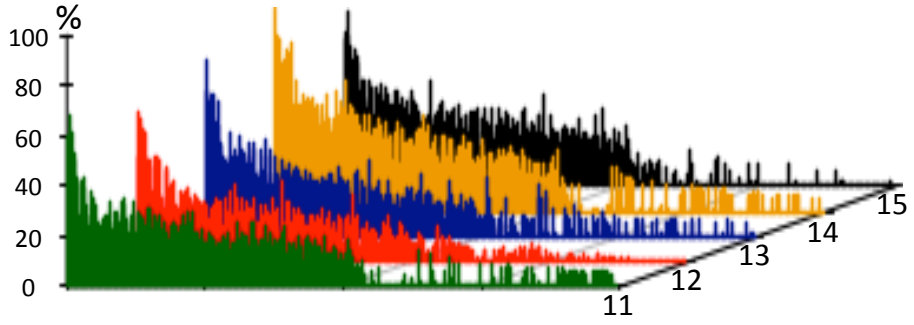

283

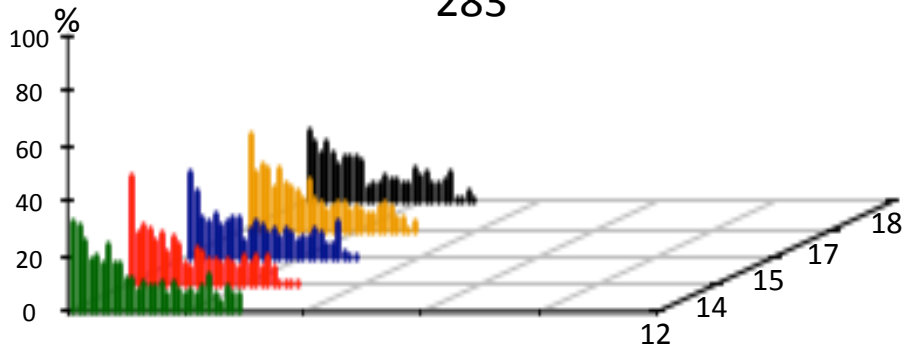

292

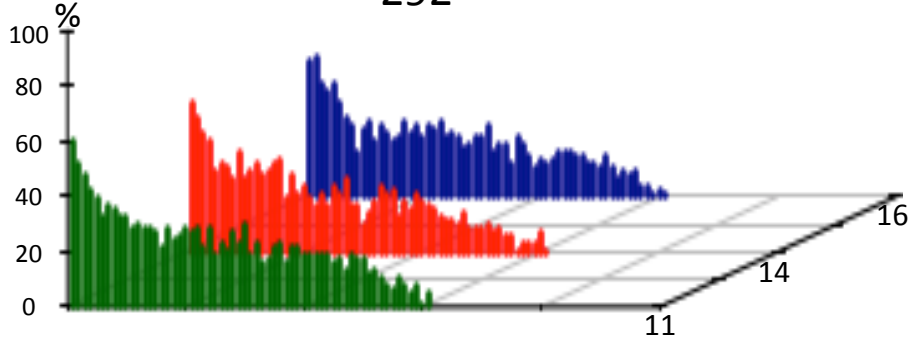

317

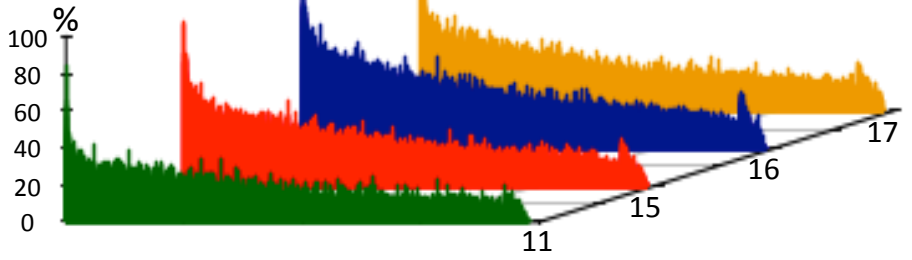

324

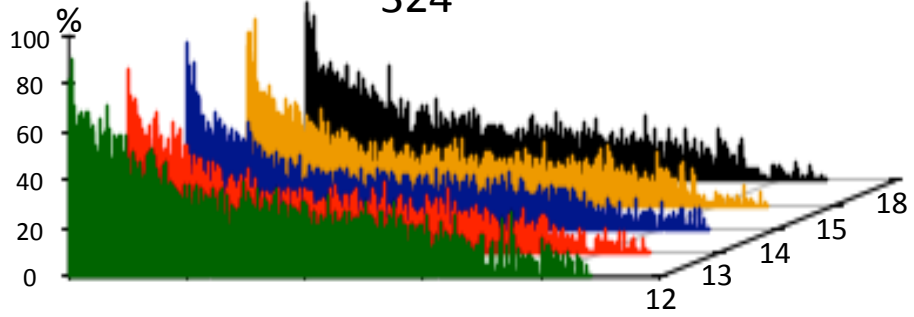

330

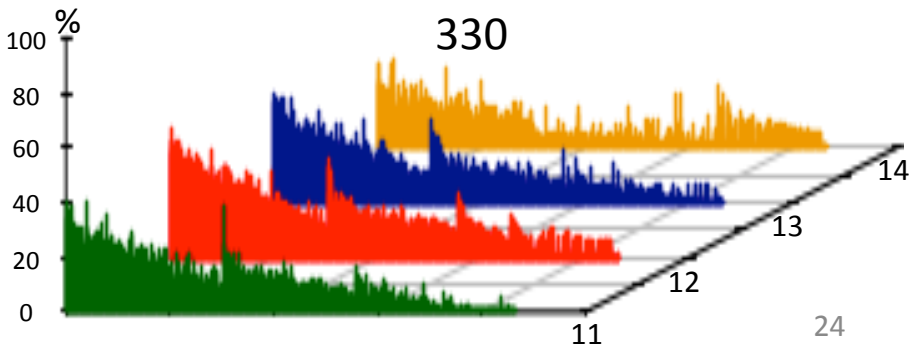

Figure S4A

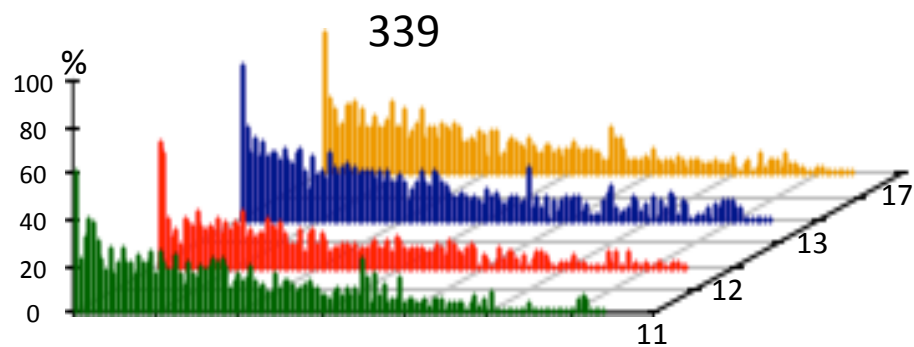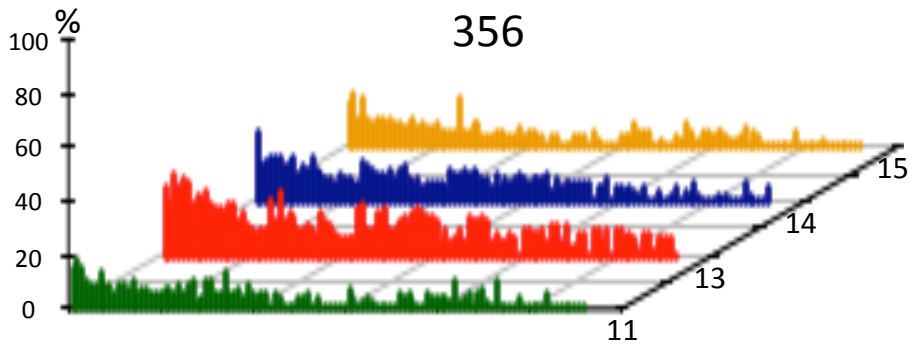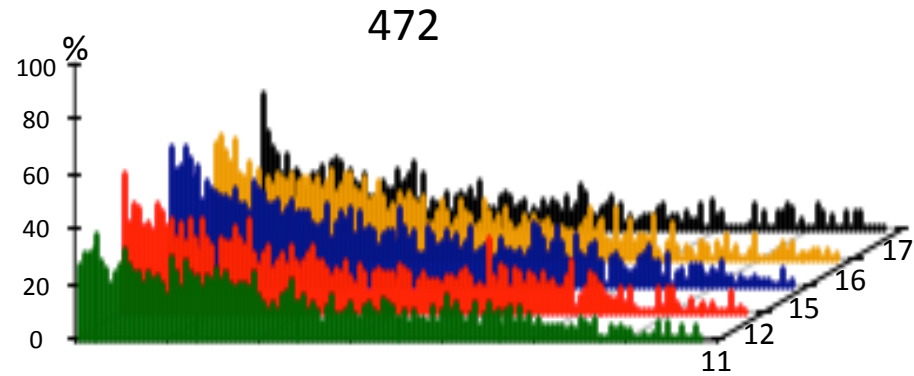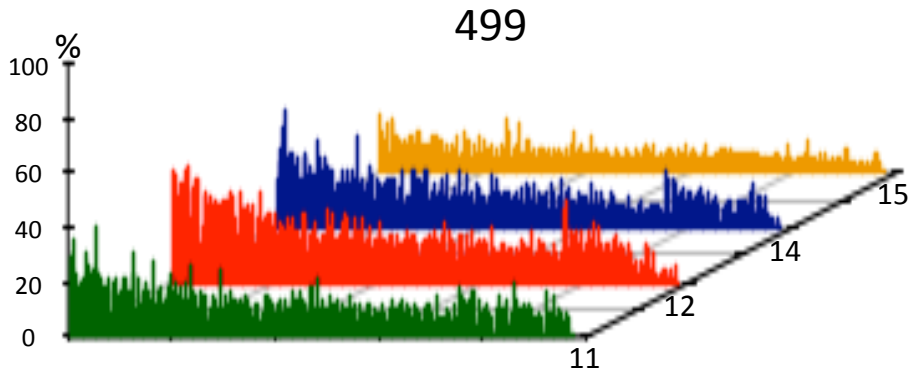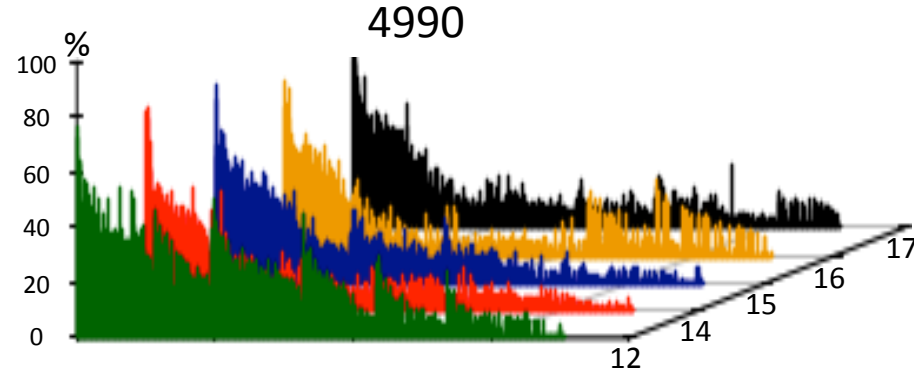



Figure S4B

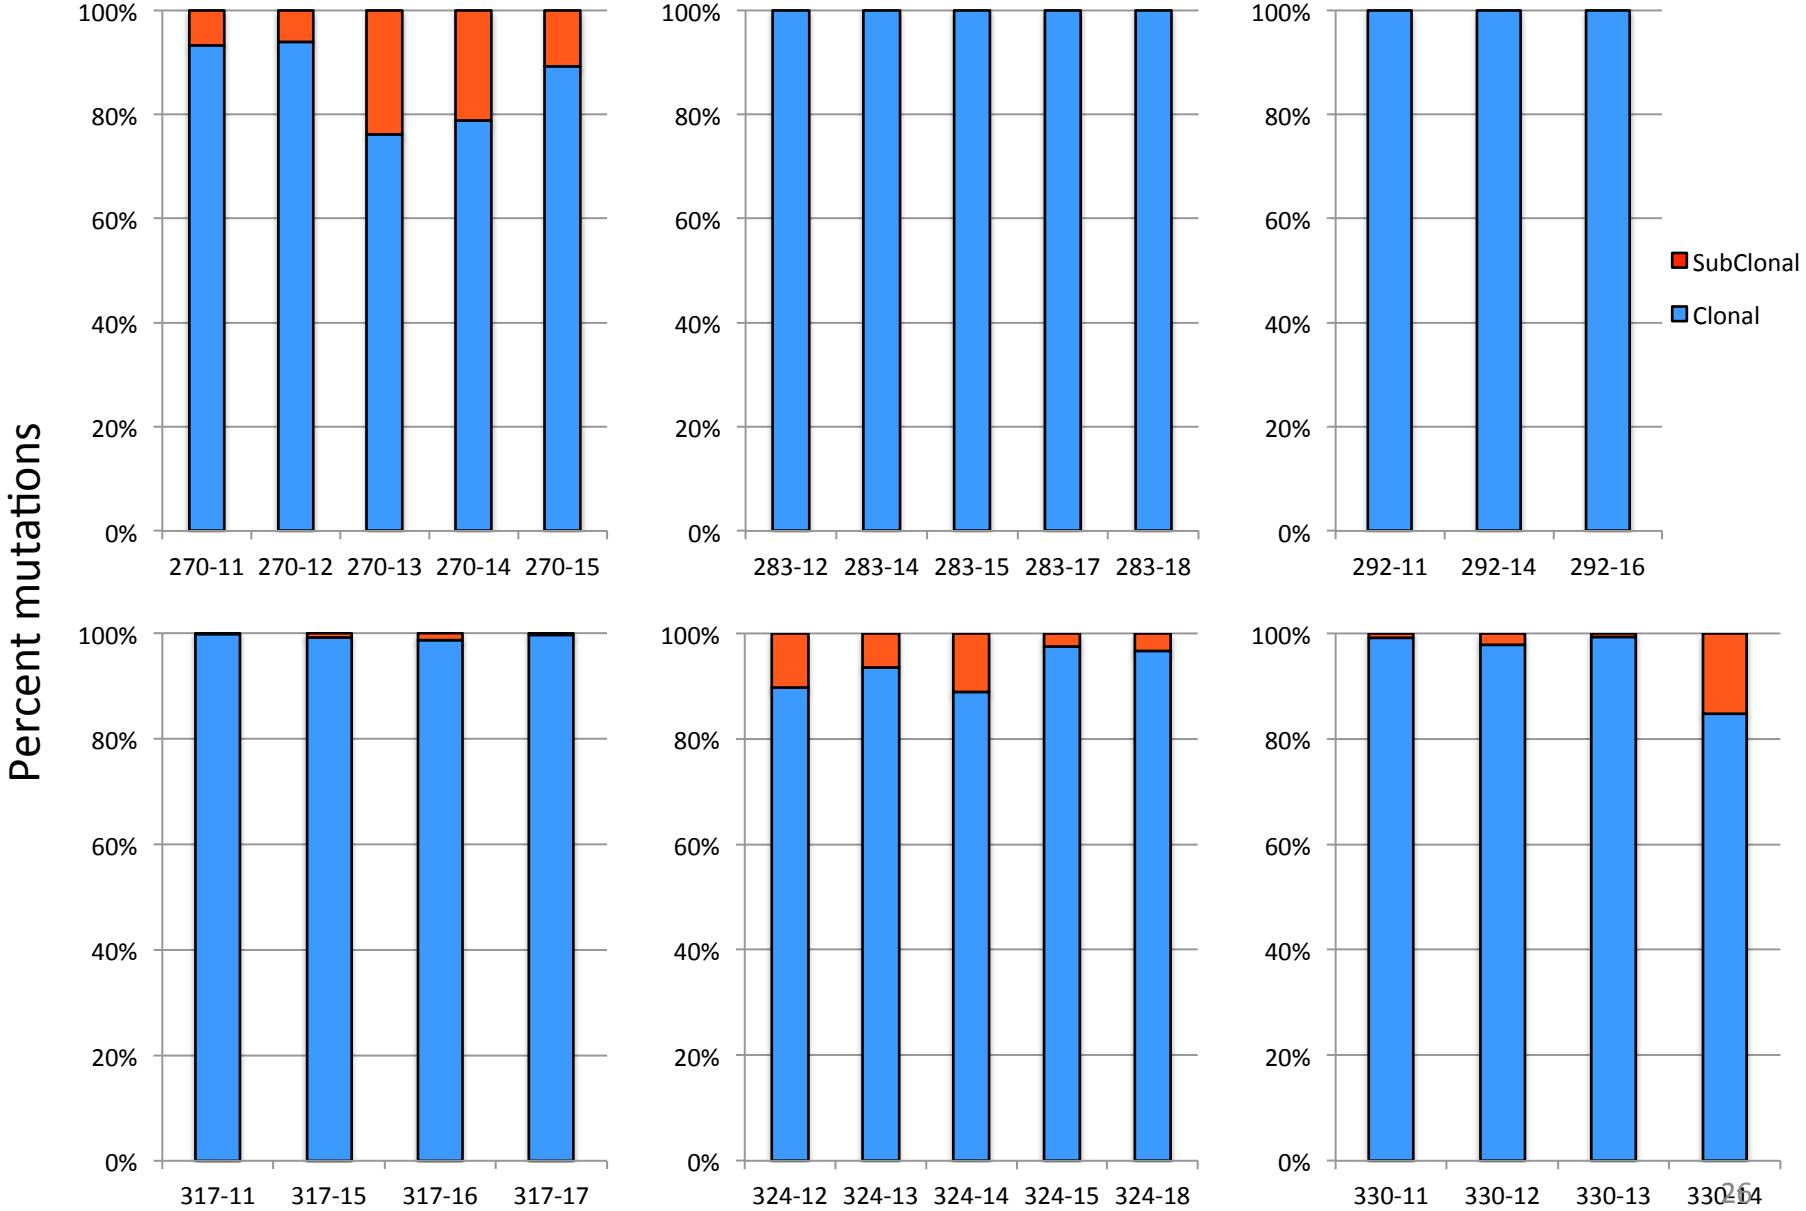

Figure S4B

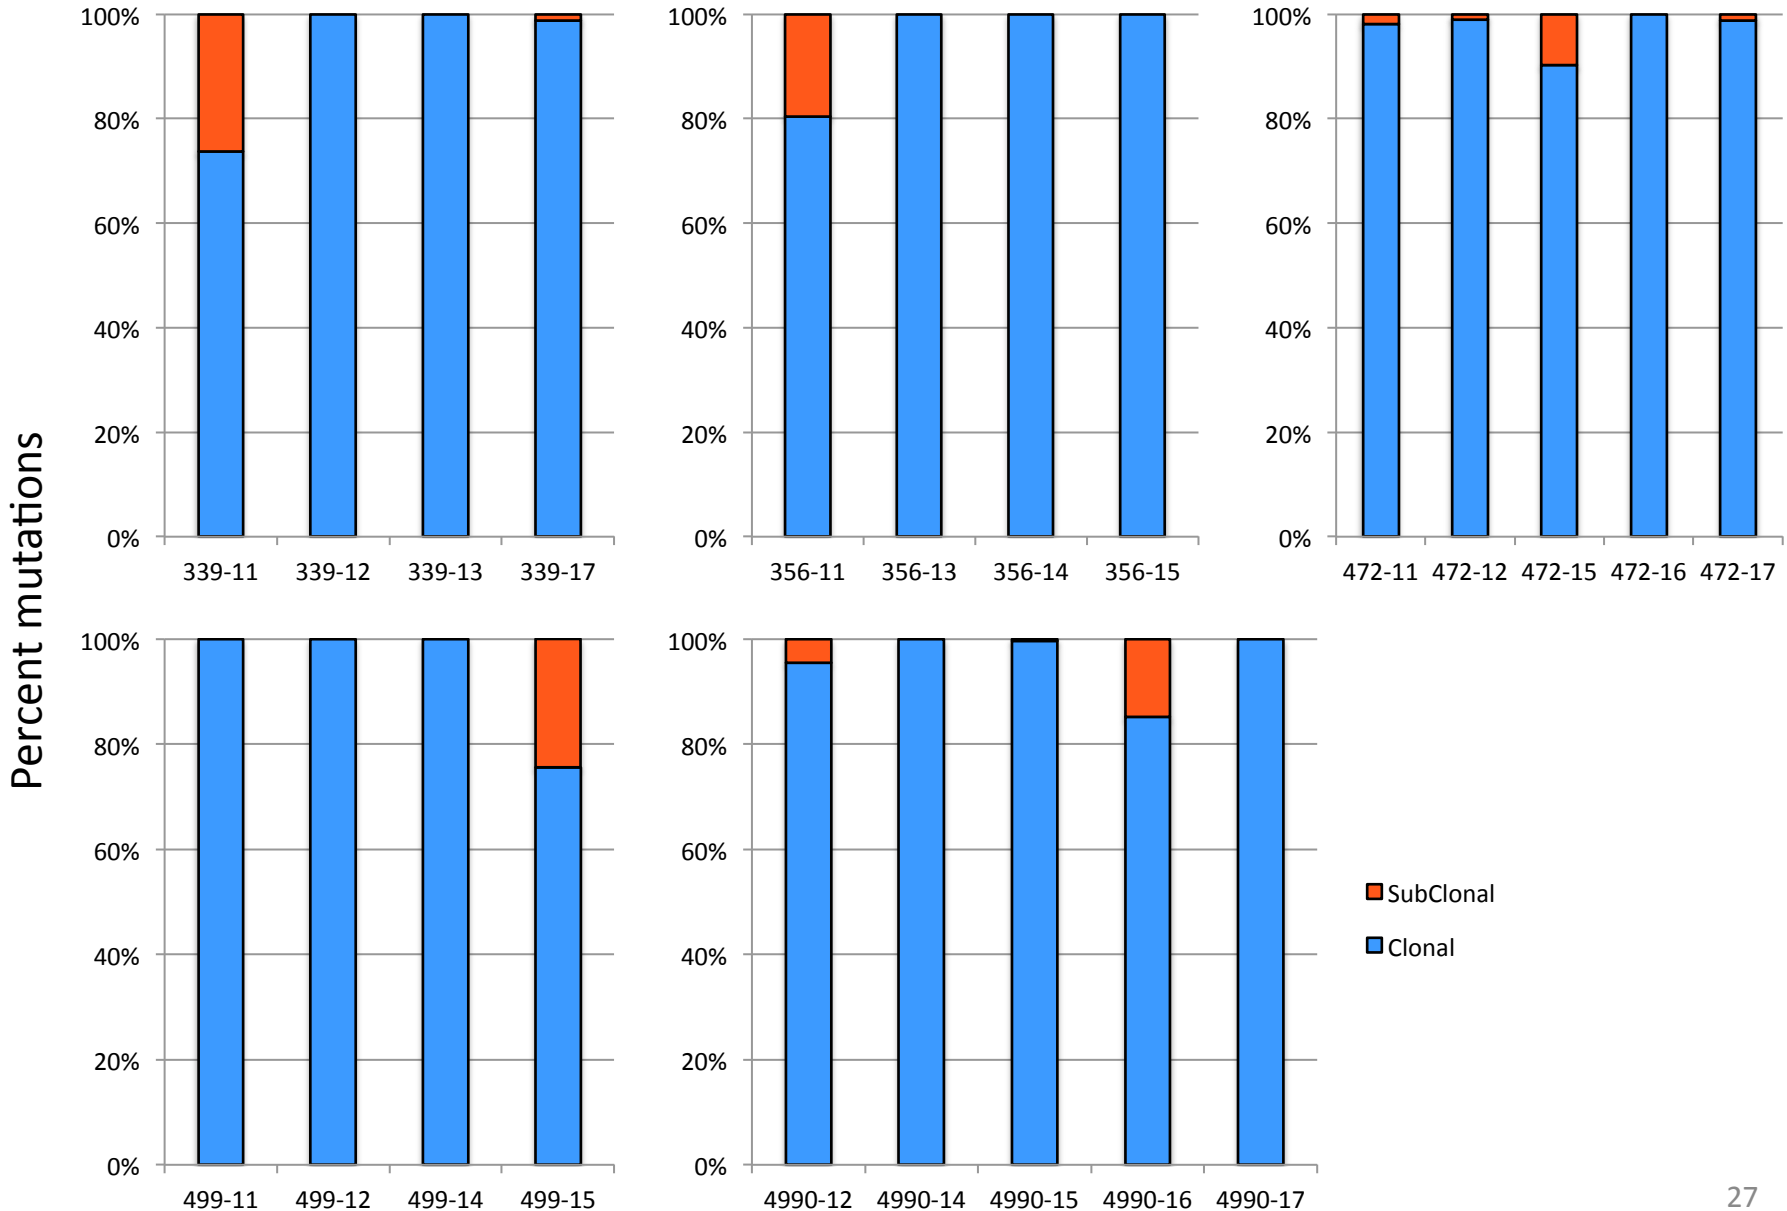

Figure S5

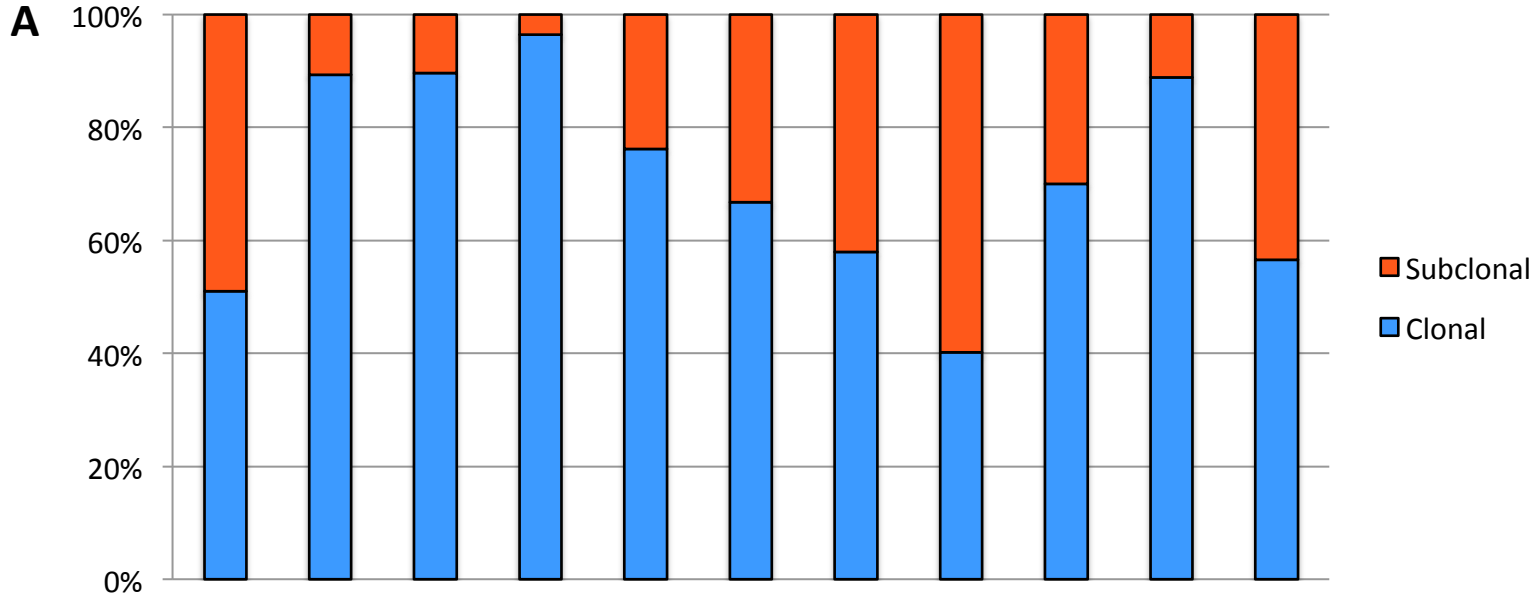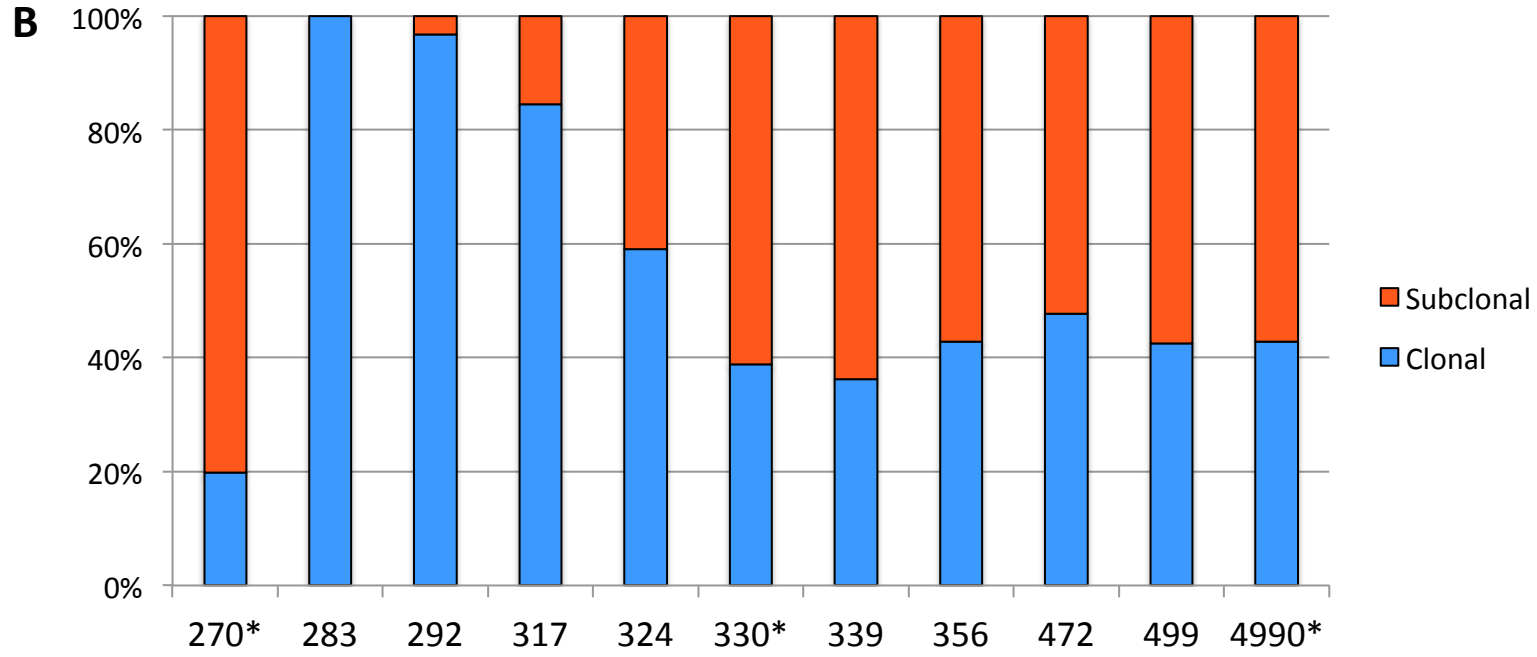

Figure S6A

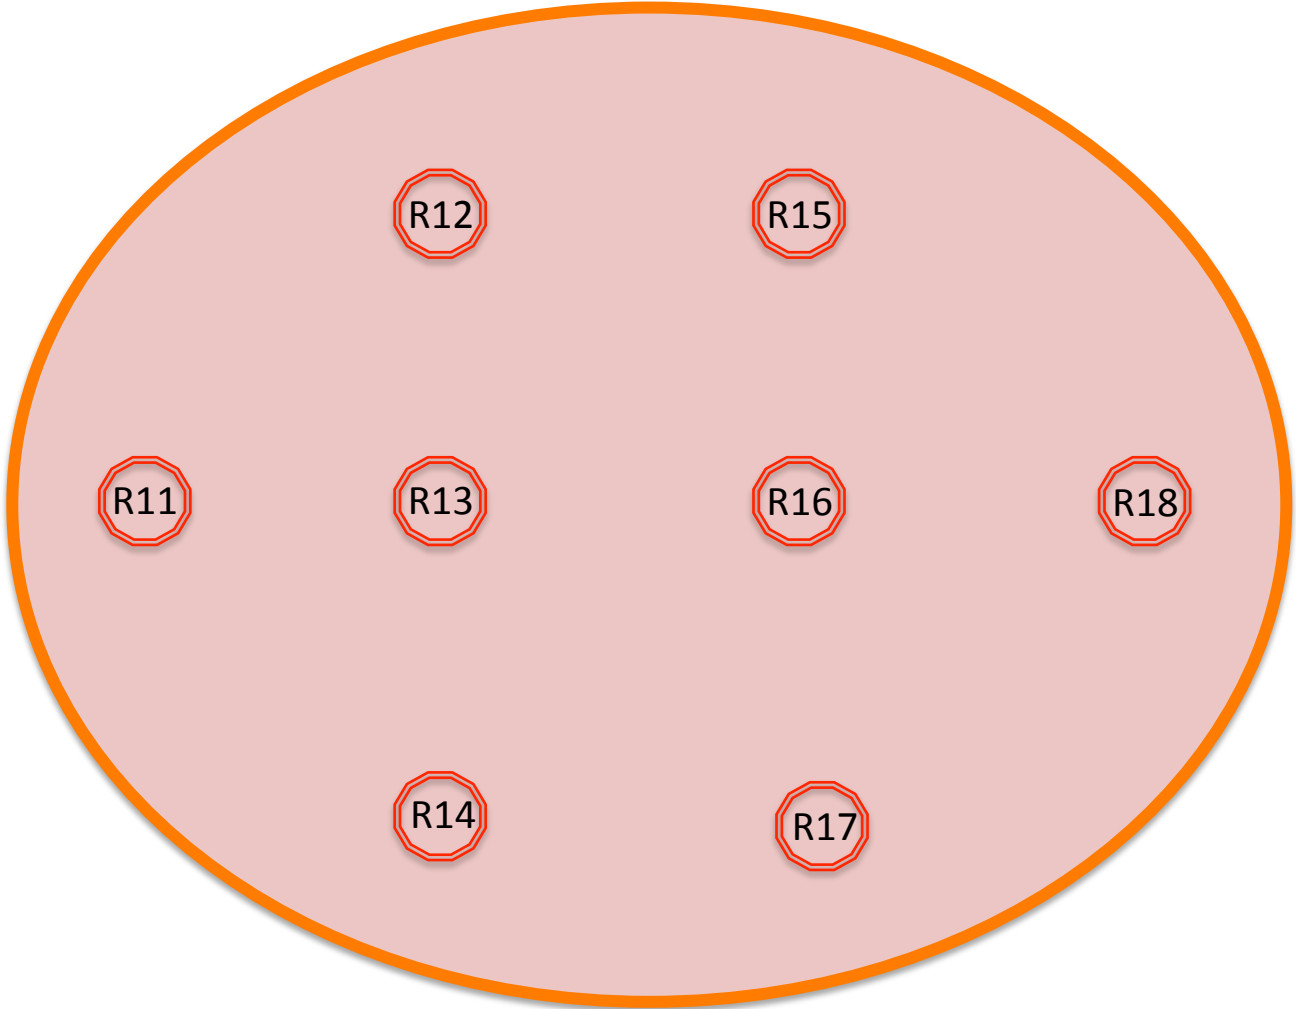

**Figure S6B**

**270**

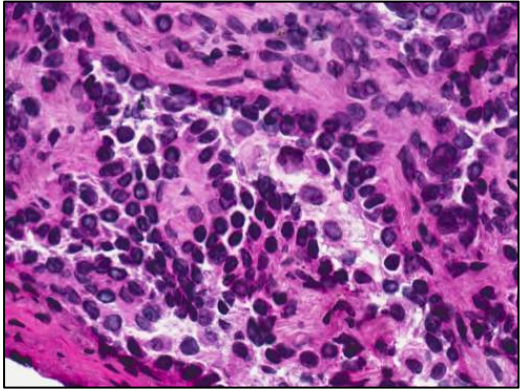

**283**

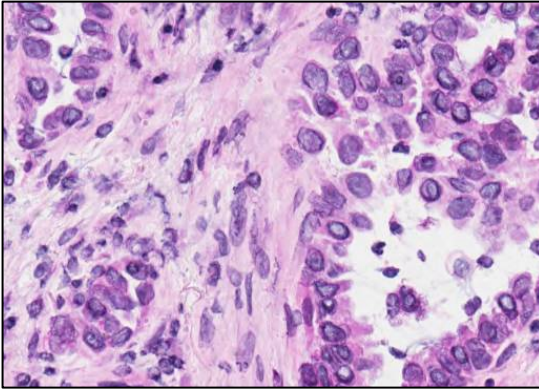

**292**

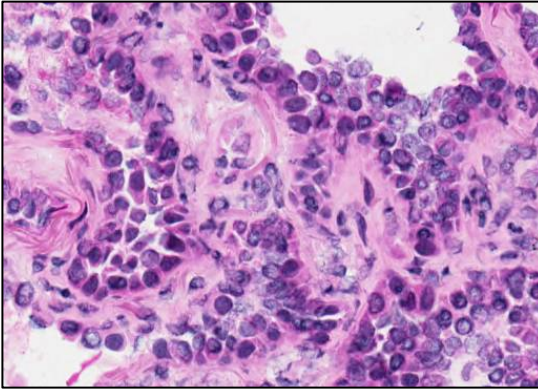

**317**

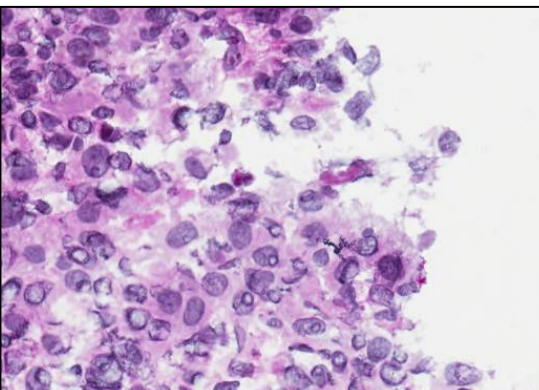

**324**

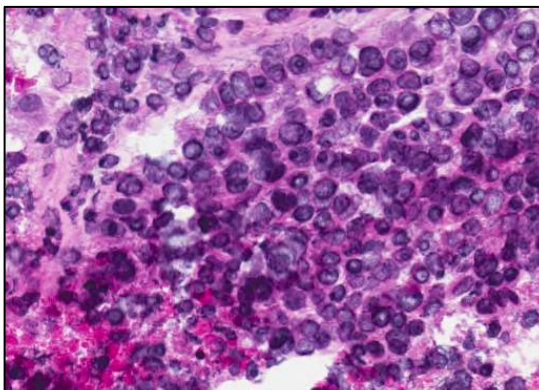

**330**

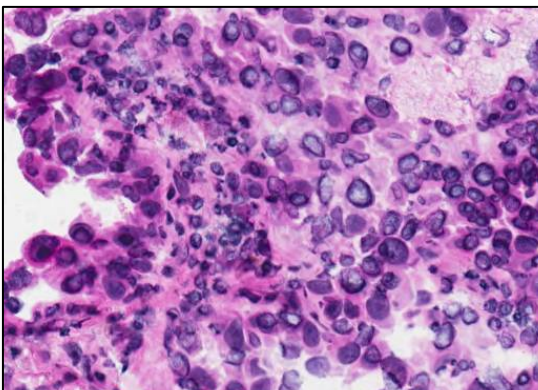

**Figure S6B**

**339**

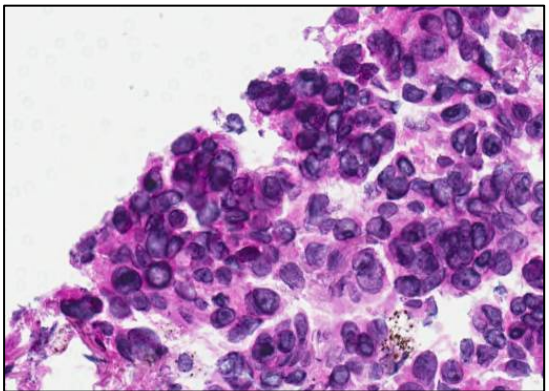

**356**

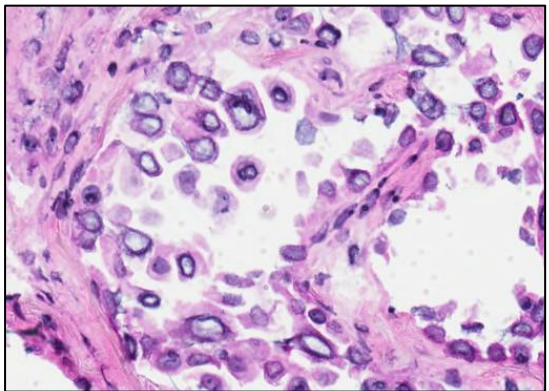

**472**

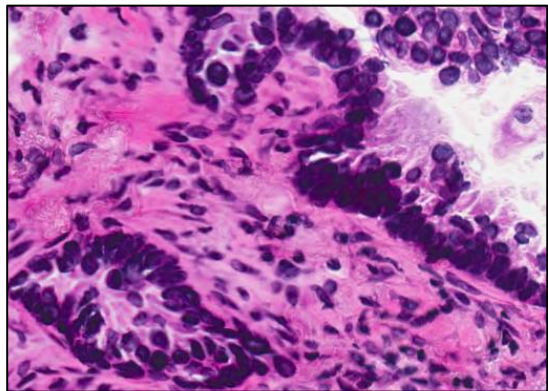

**499**

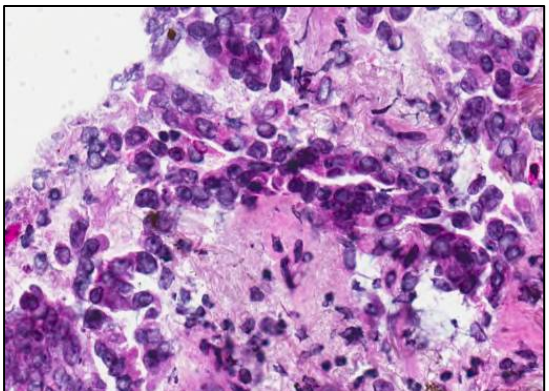

**4990**

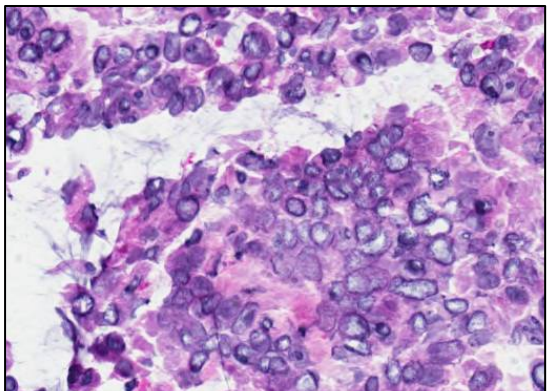

## List of Supplementary Tables

**Table S1.** Patient characteristics

**Table S2.** Validated mutations

**Table S3.** Known cancer gene mutations

**Table S4.** The log<sub>2</sub> ratio for copy number changes in 48 tumor samples
